# Supplementary material for: Trichloroacetic acid fueled practical amine purifications
Source: publisher site journal article supplement (doi:10.3762/bjoc.18.26), 2022-02-24

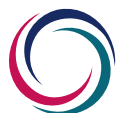

## Supporting Information

for

### Trichloroacetic acid fueled practical amine purifications

Aleena Thomas, Baptiste Gasch, Enzo Olivieri and Adrien Quintard

*Beilstein J. Org. Chem.* **2022**, *18*, 225–231. doi:10.3762/bjoc.18.26

## Experimental details

## Table of Contents

|                                                                                  |     |
|----------------------------------------------------------------------------------|-----|
| General information.....                                                         | S3  |
| Optimization of the decarboxylation.....                                         | S3  |
| TCA as dissipative acid for amine purifications.....                             | S4  |
| Examples of amines who did not generate a TCA salt under our first attempts..... | S35 |

### General information

NMR spectra were recorded on a Bruker AC 300 (300 MHz) or a Bruker AC 400 (400 MHz) spectrometer in CDCl<sub>3</sub>. Chemical shifts are given in ppm, using as internal standards the residual solvent signal ( $\delta = 7.26$ ). Data for <sup>1</sup>H NMR are reported as follows: chemical shift (multiplicity [s = singlet, d = doublet, t = triplet, q = quadruplet, m = multiplet, br = broad], coupling constants *J* in Hertz (Hz), integration).

All reagents used are commercially available and were used directly without further purification. Given the toxicity of the generated chloroform, all experiments should be performed under fume-hoods.

### Optimization of the decarboxylation:

Dicyclohexylamine **1** (37 mg, 0.21 mmol, 1 equiv.) and naphthalene (27 mg, 0.21 mmol, 1 equiv.) were dissolved in EtOAc (0.5 mL). TCA (100 mg, 0.62 mmol, 3 equiv.) was then added at room temperature. The generated white precipitate was filtered and washed with EtOAc (2 x 1 mL). From this white precipitate, various conditions were tested for the optimization of the decarboxylation to obtain purified amine as shown in the table below.

Decarboxylation conditions:

| No. | Conditions                                                                    | Results (purification yield)                                |
|-----|-------------------------------------------------------------------------------|-------------------------------------------------------------|
| 1   | EtOAc, 60°C, 24 h                                                             | Partial TCA decarboxylation                                 |
| 2   | DMF, 60°C, 15 min (10-100 mbar)                                               | Complete TCA decarboxylation but difficulty at removing DMF |
| 3   | CH <sub>3</sub> CN, rt, 24 h                                                  | Complete TCA decarboxylation (86%)                          |
| 4   | CH <sub>3</sub> CN, 60 °C, 15 min (10-100 mbar)                               | Partial TCA decarboxylation                                 |
| 5   | Neat, 60 °C, 30 min (10-100 mbar)                                             | Partial TCA decarboxylation                                 |
| 6   | Neat, 100 °C, 1 h                                                             | Partial TCA decarboxylation                                 |
| 7   | CH <sub>3</sub> CN, 10 mol% Et <sub>3</sub> N, rt, 24 h                       | Complete TCA decarboxylation (93%)                          |
| 8   | CH <sub>3</sub> CN, 1.5 equiv. Et <sub>3</sub> N, rt, 24 h                    | Complete TCA decarboxylation (91%)                          |
| 9   | CH <sub>3</sub> CN, 1.5 equiv. Et <sub>3</sub> N, 60 °C, 15 min (10-100 mbar) | Complete TCA decarboxylation (94%)                          |

### TCA as dissipative acid for amine purifications:

#### Dicyclohexylamine **1**

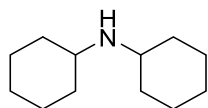

Dicyclohexylamine (37 mg, 0.21 mmol, 1 equiv.) and 2-methoxynaphthalene (33 mg, 0.21 mmol, 1 equiv.) were dissolved in EtOAc (1 mL). TCA (100 mg, 0.62 mmol, 3 equiv.) was then added at room temperature. The white precipitate formed was filtered and washed with EtOAc (2 x 2 mL). CH<sub>3</sub>CN (2 mL) and Et<sub>3</sub>N (0.04 mL, 0.32 mmol, 1.5 equiv.) were then added and the solvent was evaporated at 60 °C for 15 min (30-100 mbar). The purified amine (35 mg, 0.2 mmol, 94% yield) was obtained as a colorless liquid.

**<sup>1</sup>H NMR** (400 MHz, CDCl<sub>3</sub>): δ (ppm) 2.56-2.49 (m, 2H), 1.85-1.8 (m, 4H), 1.72-1.66 (m, 4H), 1.6-1.54 (m, 2H), 1.27-0.94 (m, 10H)

**<sup>13</sup>C NMR** (75 MHz, CDCl<sub>3</sub>): δ (ppm) 53.14, 34.39, 26.28, 25.40

Data in accordance with the literature.

Reference : <https://sdb.db.aist.go.jp/sdb/cgi-bin/landingpage?sdbno=2107>

$^1\text{H}$  NMR of the purified amine:

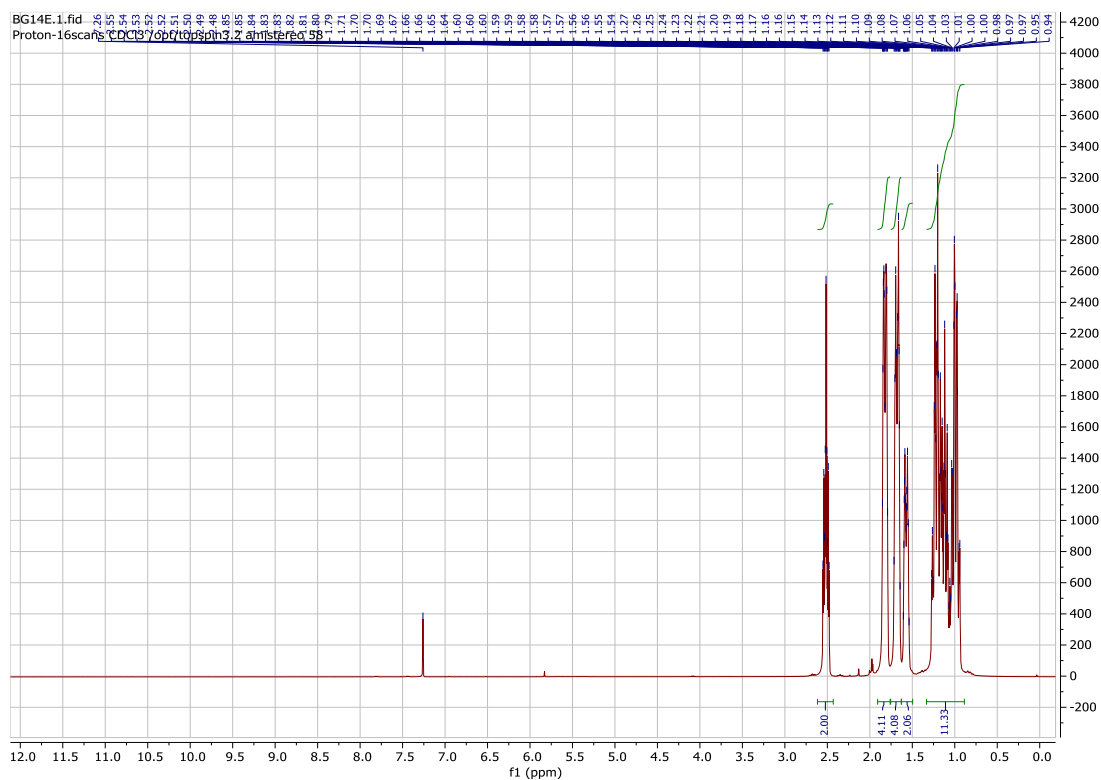

$^{13}\text{C}$  NMR of the purified amine:

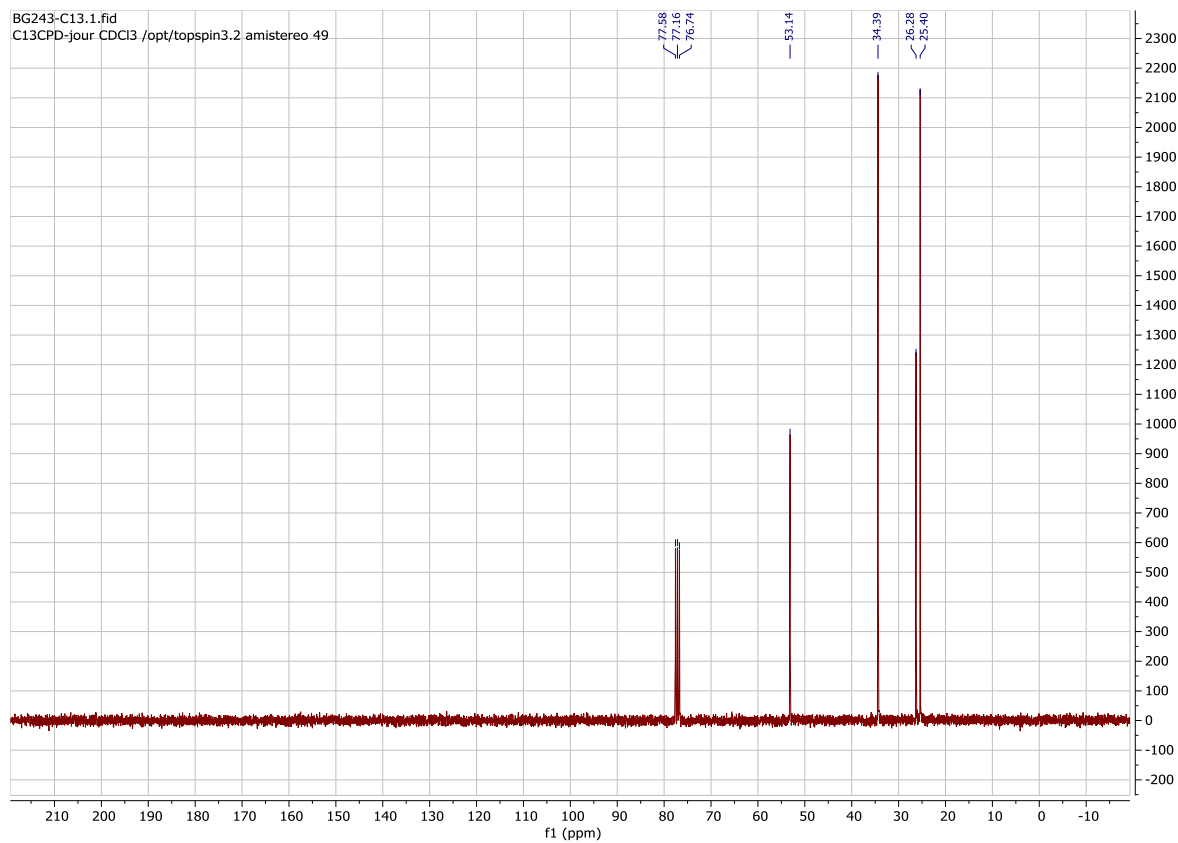

<sup>1</sup>H NMR obtained with the decarboxylation condition of entry 1 (EtOAc alone): Presence of the TCA.amine salt

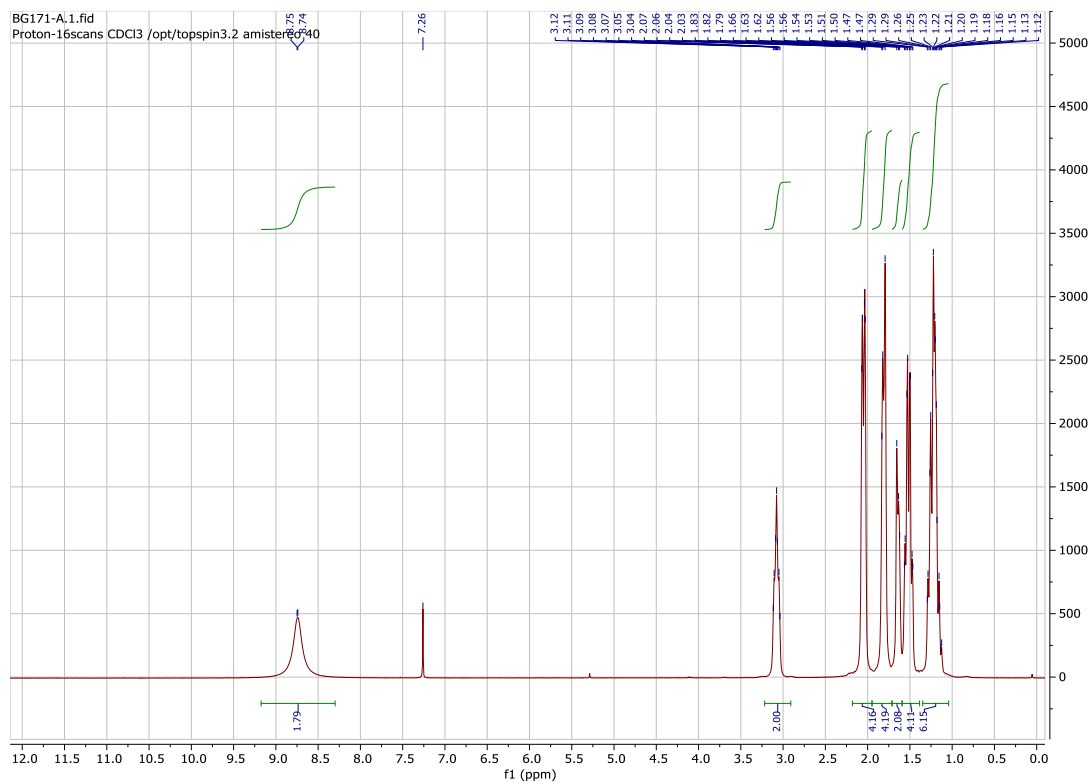

Various impurities tested with dicyclohexylamine following the same purification protocol:

| No. | Impurity (0.21 mmol, 1 equiv.) | Results (purified amine) |
|-----|--------------------------------|--------------------------|
| 1   | Naphthalene                    | 94%                      |
| 2   | 2-methoxynaphthalene           | 95%                      |
| 3   | Phenol                         | 53%                      |
| 4   | Mesitol                        | 80%                      |
| 5   | Catechol                       | 69%                      |
| 6   | Nonadecane                     | 90%                      |
| 7   | 1-decene                       | 98%                      |
| 8   | DMF                            | 81%                      |

*o*-anisidine **2**

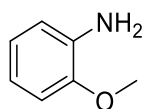

*o*-anisidine (26.8 mg, 0.21 mmol, 1 equiv.) and 2-methoxynaphthalene (33 mg, 0.21 mmol, 1 equiv.) were dissolved in EtOAc (1 mL). TCA (100 mg, 0.62 mmol, 3 equiv.) was then added at room temperature. The precipitate formed was filtered and washed with ice cold EtOAc (2 x 2 mL). CH<sub>3</sub>CN (2 mL) and Et<sub>3</sub>N (0.04 mL, 0.32 mmol, 1.5 equiv.) were added and the solvent was evaporated at 60 °C (30-100 mbar) for 15 min to obtain the purified amine (19.5 mg, 0.15 mmol, 72% yield).

**<sup>1</sup>H NMR** (400 MHz, CDCl<sub>3</sub>): δ (ppm) 6.82-6.71 (m, 4H), 3.86 (s, 3H)

**<sup>13</sup>C NMR** (75 MHz, CDCl<sub>3</sub>): δ (ppm) 147.44, 136.27, 121.18, 118.57, 115.13, 110.57, 55.52

Data in accordance with literature.

Reference : <https://sdb.db.aist.go.jp/sdb/cgi-bin/landingpage?sdbno=1475>

$^1\text{H}$  NMR of the purified amine:

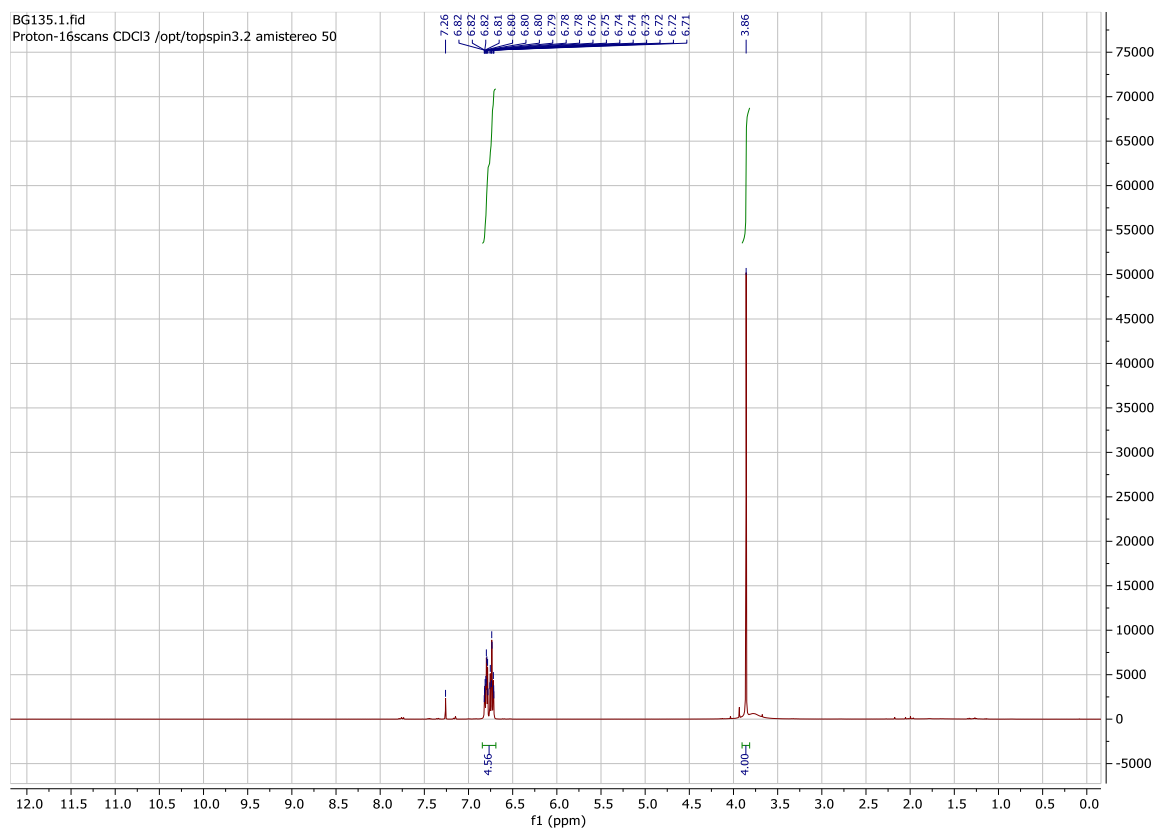

$^{13}\text{C}$  NMR of the purified amine:

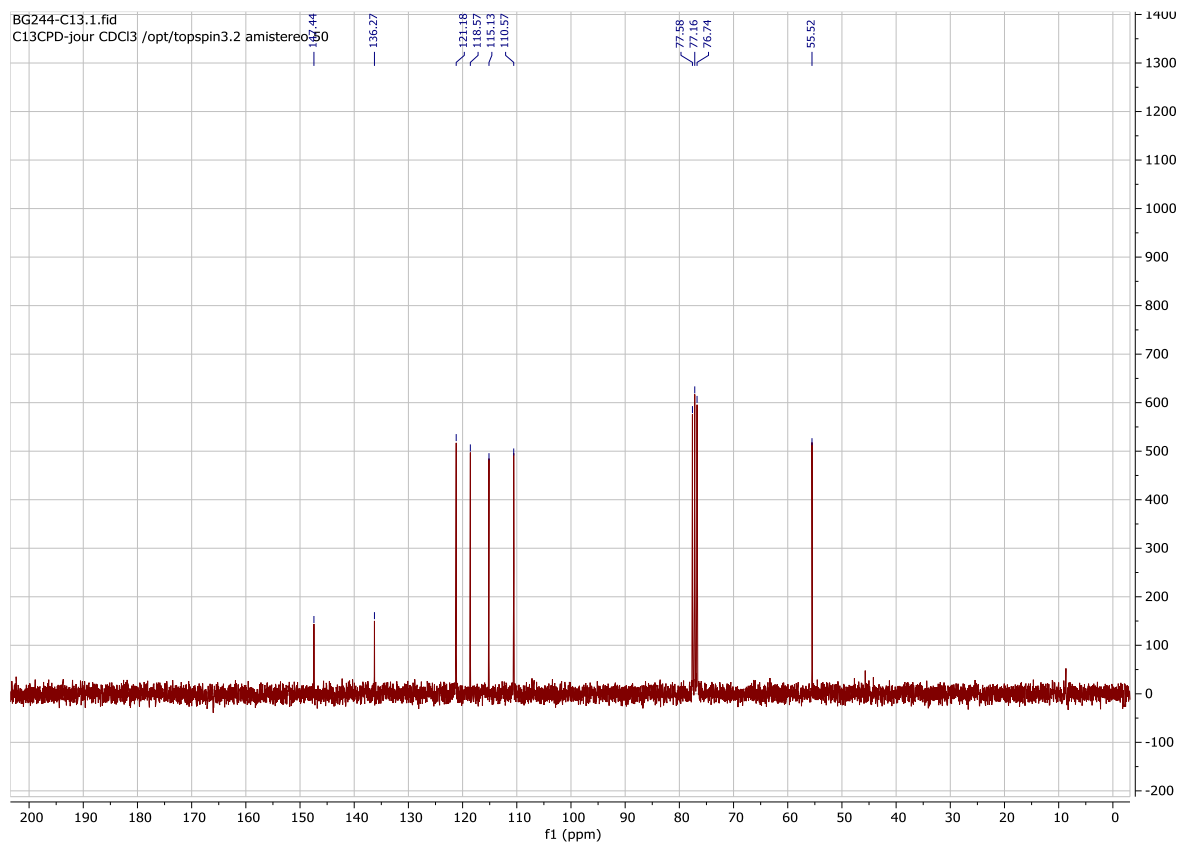



### 8-aminoquinoline **3**

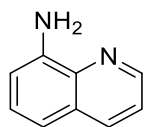

8-aminoquinoline (30 mg, 0.21 mmol, 1 equiv.) and 2-methoxynaphthalene (33 mg, 0.21 mmol, 1 equiv.) were dissolved in EtOAc (1 mL). TCA (100 mg, 0.62 mmol, 3 equiv.) was then added at room temperature. The precipitate formed was filtered and washed with EtOAc (2 x 2 mL). CH<sub>3</sub>CN (2 mL) and Et<sub>3</sub>N (0.04 mL, 0.32 mmol, 1.5 equiv.) were added and the solvent was evaporated at 60 °C (10-100 mbar) for 15 min to obtain the purified amine (12.4 mg, 0.08 mmol, 40% yield).

**<sup>1</sup>H NMR** (400 MHz, CDCl<sub>3</sub>): δ (ppm) 8.77 (dd, *J* = 1.6; 4.1 Hz, 1H), 8.06 (dd, *J* = 1.6; 8.4 Hz, 1H), 7.38-7.31 (m, 2H), 7.17-7.14 (m, 1H), 6.94-6.92 (m, 1H), 4.97 (br, 2H)

**<sup>13</sup>C NMR** (75 MHz, CDCl<sub>3</sub>): δ (ppm) 147.53, 144.08, 138.54, 136.08, 128.96, 127.48, 116.13, 110.14

Data in accordance with the literature.

Reference : <https://www.sigmaaldrich.com/deepweb/assets/sigmaaldrich/quality/spectra/308/09/FNMR004723.pdf>

# <sup>1</sup>H NMR of the purified amine:

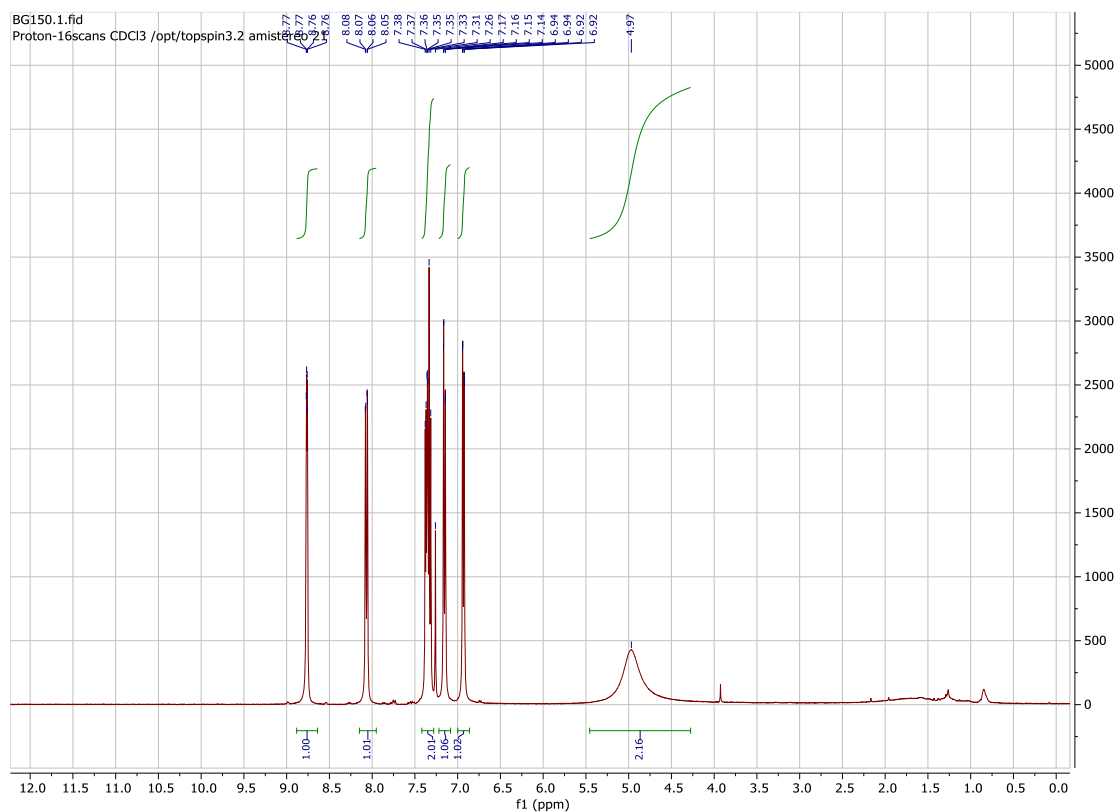

# <sup>13</sup>C NMR of the purified amine:

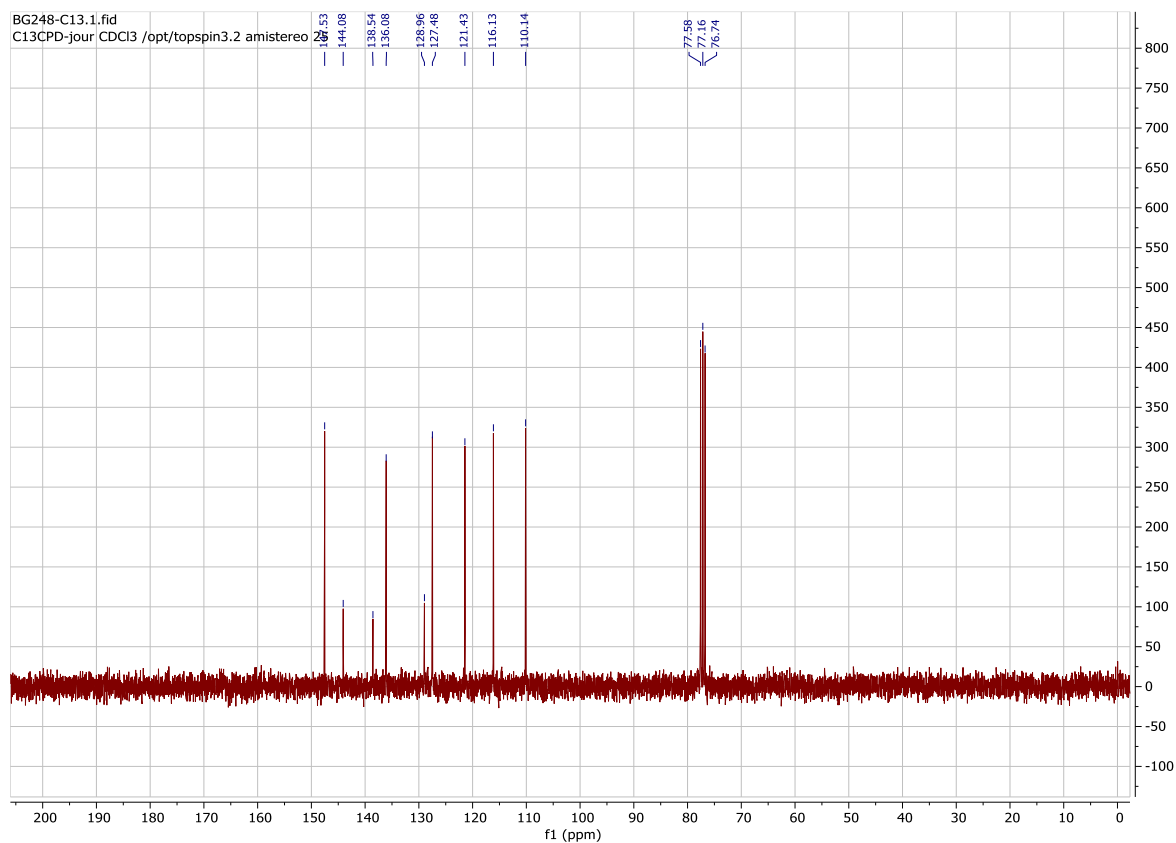

#### 1,8-diaminonaphthalene **4**

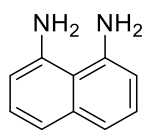

1,8-diaminonaphthalene (31 mg, 0.21 mmol, 1 equiv.) and naphthalene (27 mg, 0.21 mmol, 1 equiv.) were dissolved in EtOAc (1 mL). TCA (100 mg, 0.62 mmol, 3 equiv.) was added at room temperature. The precipitate formed was filtered and washed with pentane (2 x 2 mL). CH<sub>3</sub>CN (2 mL) and Et<sub>3</sub>N (0.04 mL, 0.32 mmol, 1.5 equiv.) were then added and the solvent was evaporated at 60 °C (10-100 mbar) for 20 min to obtain the purified amine (14 mg, 0.08 mmol, 40% yield).

**<sup>1</sup>H NMR** (300 MHz, CDCl<sub>3</sub>): δ (ppm) 7.22-7.14 (m, 4H), 6.59 (dd, *J* = 3; 6 Hz, 2H), 4.55 (br, 4H)

**<sup>13</sup>C NMR** (75 MHz, CDCl<sub>3</sub>): δ (ppm) 144.61, 137.16, 126.35, 119.94, 117.28, 111.72

Data in accordance with literature.

Reference : <https://sdb.db.aist.go.jp/sdb/cgi-bin/landingpage?sdbno=6655>

### $^1\text{H}$ NMR of the purified amine:

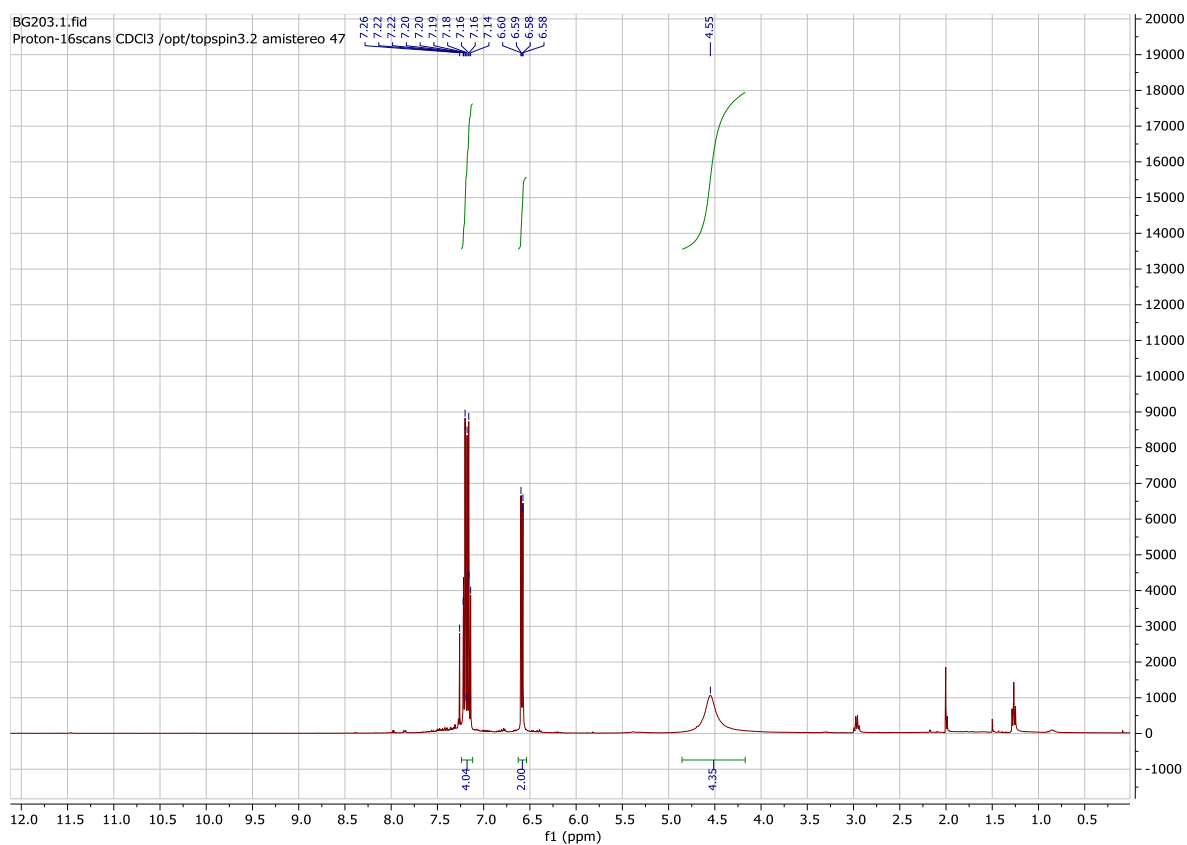

### $^{13}\text{C}$ NMR of the purified amine:

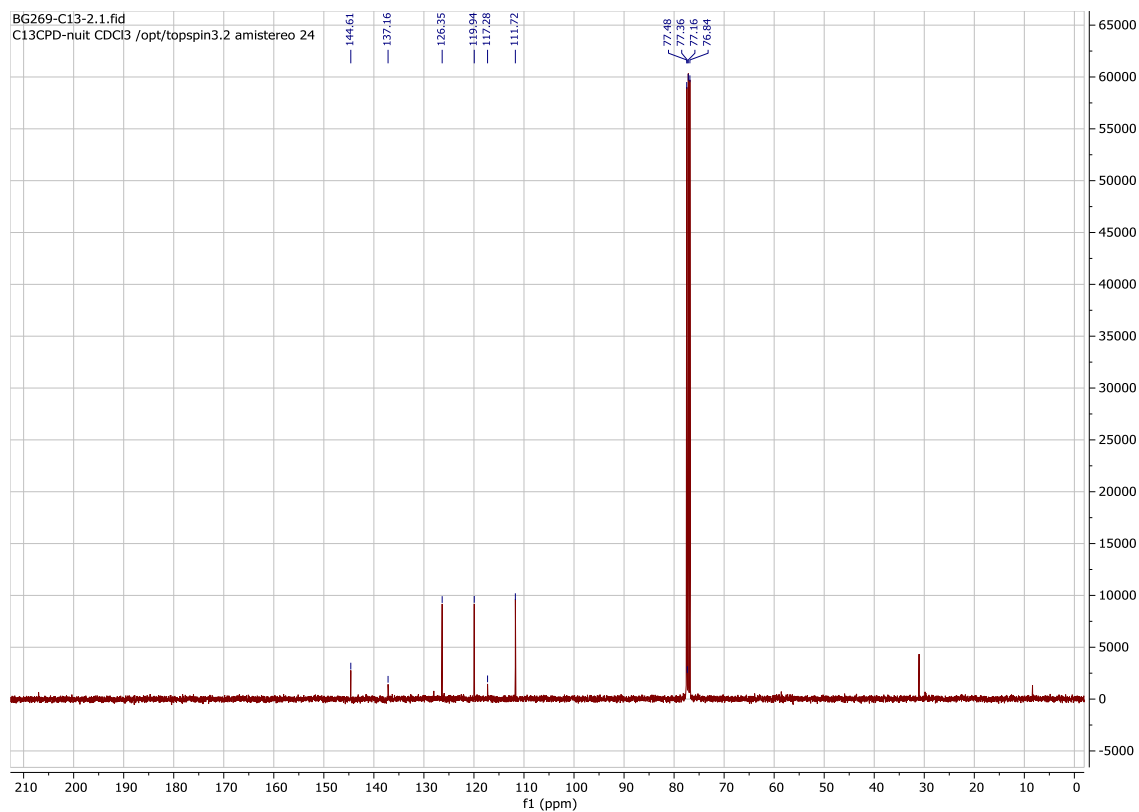

### 3-bromophenethylamine **5**

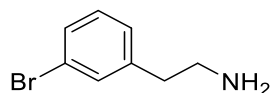

3-bromophenethylamine (42 mg, 0.21 mmol, 1 equiv.) and naphthalene (27 mg, 0.21 mmol, 1 equiv.) were dissolved in EtOAc (1 mL). TCA (100 mg, 0.62 mmol, 3 equiv.) was added at room temperature. The precipitate formed was filtered and washed with pentane (2 x 2 mL). CH<sub>3</sub>CN (2 mL) and Et<sub>3</sub>N (0.04 mL, 0.32 mmol, 1.5 equiv.) were added and the solvent was evaporated at 60 °C (10-100 mbar) for 15 min to obtain the purified amine (38 mg, 0.15 mmol, 71% yield).

**<sup>1</sup>H NMR** (400 MHz, CDCl<sub>3</sub>): δ (ppm) 7.34–7.32 (m, 2H), 7.17–7.1 (m, 2H), 2.95 (t, *J* = 6.8 Hz, 2H), 2.71 (t, *J* = 6.8 Hz, 2H)

**<sup>13</sup>C NMR** (75 MHz, CDCl<sub>3</sub>): δ (ppm) 142.3, 131.95, 130.13, 129.44, 127.62, 122.65, 43.34, 39.71

$^1\text{H}$  NMR of the purified amine:

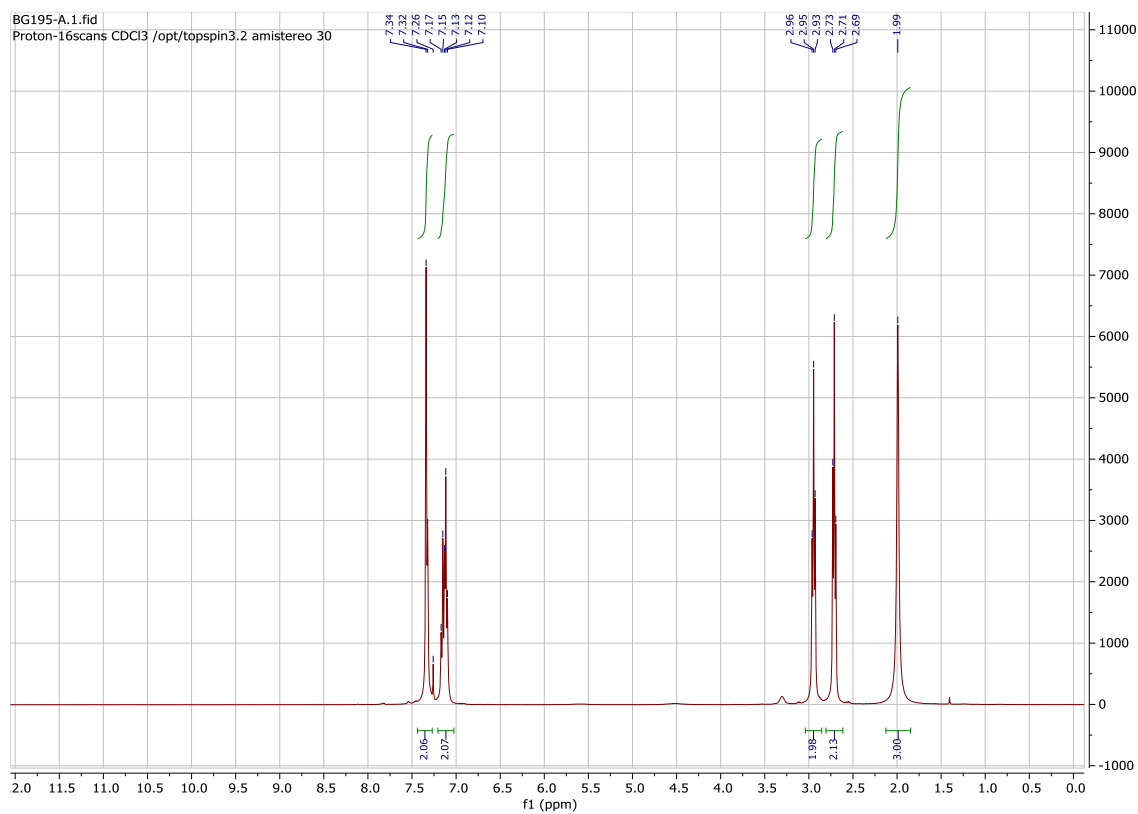

$^{13}\text{C}$  NMR of the purified amine:

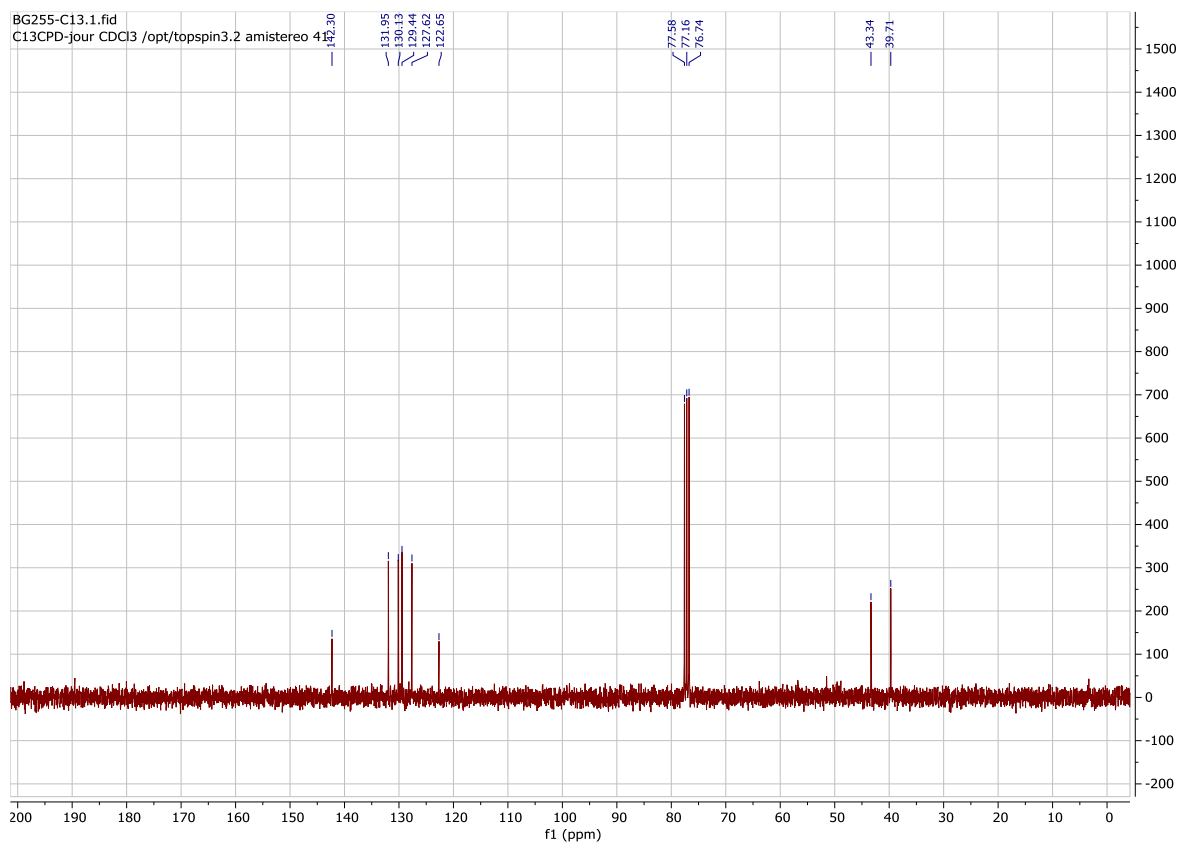

*m*-toluidine **6**

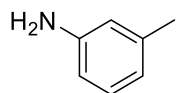

*m*-toluidine (24 mg, 0.21 mmol, 1 equiv.) and naphthalene (27 mg, 0.21 mmol, 1 equiv.) were dissolved in EtOAc (1 mL). TCA (100 mg, 0.62 mmol, 3 equiv.) was added at room temperature. The precipitate formed was filtered and washed with pentane (2 x 2 mL). CH<sub>3</sub>CN (2 mL) and Et<sub>3</sub>N (0.04 mL, 0.32 mmol, 1.5 equiv.) were added and the solvent was evaporated at 60 °C (30-100 mbar) for 15 min to obtain the purified amine (19 mg, 0.14 mmol, 79% yield).

**<sup>1</sup>H NMR** (400 MHz, CDCl<sub>3</sub>): δ (ppm) 7.05 (t, *J* = 8.0 Hz, 1H), 6.6 (d, *J* = 7.6 Hz, 1H), 6.53-6.49 (m, 2H), 3.59 (br, 2H), 2.28 (s, 3H)

**<sup>13</sup>C NMR** (75 MHz, CDCl<sub>3</sub>): δ (ppm) 146.45, 139.22, 129.26, 119.56, 116.03, 112.36, 21.52

Data in accordance with literature.

Reference : <https://sdb.db.aist.go.jp/sdb/cgi-bin/landingpage?sdbno=1156>

$^1\text{H}$  NMR of the purified amine:

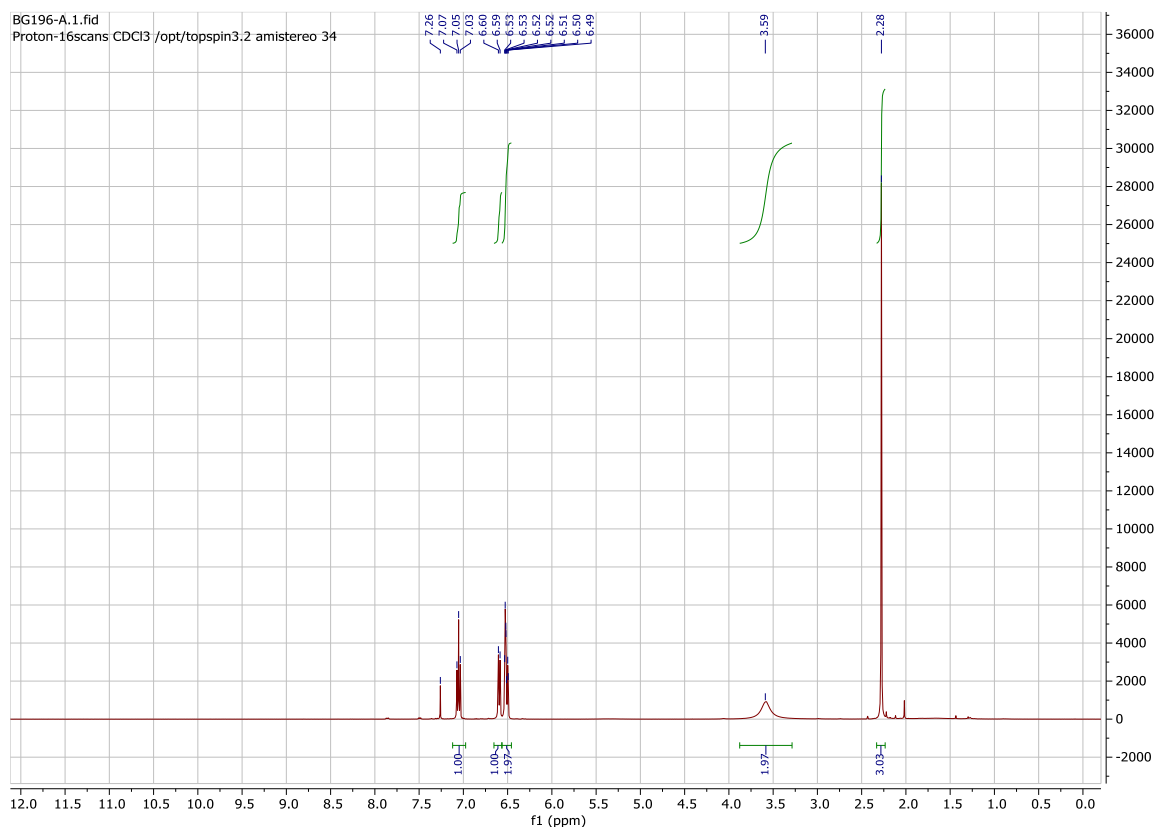

$^{13}\text{C}$  NMR of the purified amine:

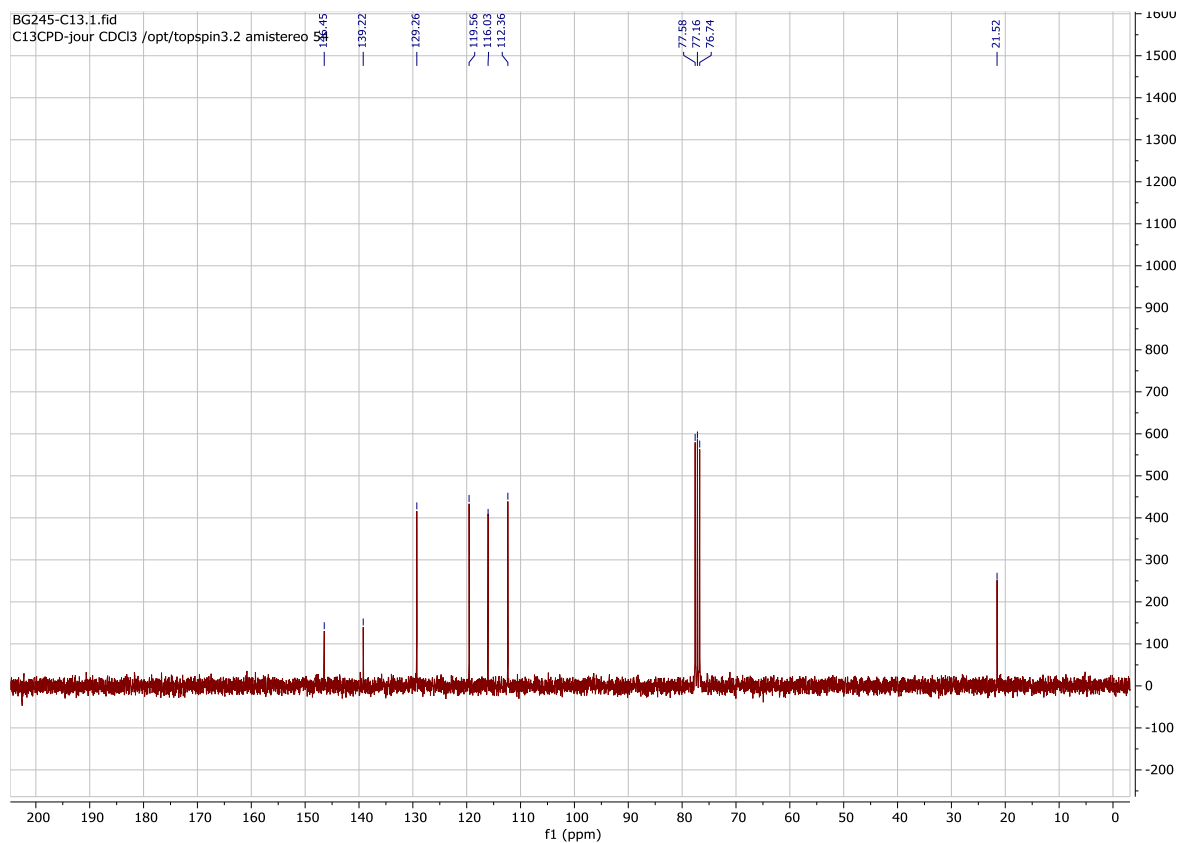



*p*-toluidine **7**

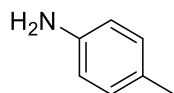

*p*-toluidine (28.9 mg, 0.21 mmol, 1 equiv.) and naphthalene (27 mg, 0.21 mmol, 1 equiv.) were dissolved in pentane (1 mL). TCA (100 mg, 0.62 mmol, 3 equiv.) was added at room temperature. The precipitate formed was filtered and washed with ice cold pentane (2 x 2 mL). CH<sub>3</sub>CN (2 mL) and Et<sub>3</sub>N (0.04 mL, 0.32 mmol, 1.5 equiv.) were added and the solvent was evaporated at 60 °C (30-100 mbar) for 15 min to obtain the purified amine (13 mg, 0.1 mmol, 45% yield).

**<sup>1</sup>H NMR** (400 MHz, CDCl<sub>3</sub>): δ (ppm) 6.98 (d, *J* = 8.0 Hz, 2H), 6.62 (d, *J* = 8.0 Hz, 2H), 3.52 (br, 2H), 2.25 (s, 3H)

**<sup>13</sup>C NMR** (75 MHz, CDCl<sub>3</sub>): δ (ppm) 143.94, 129.86, 127.89, 115.38, 20.55

Data in accordance with literature.

Reference : <https://sdb.sdb.aist.go.jp/sdb/cgi-bin/landingpage?sdbno=990>

$^1\text{H}$  NMR of the purified amine:

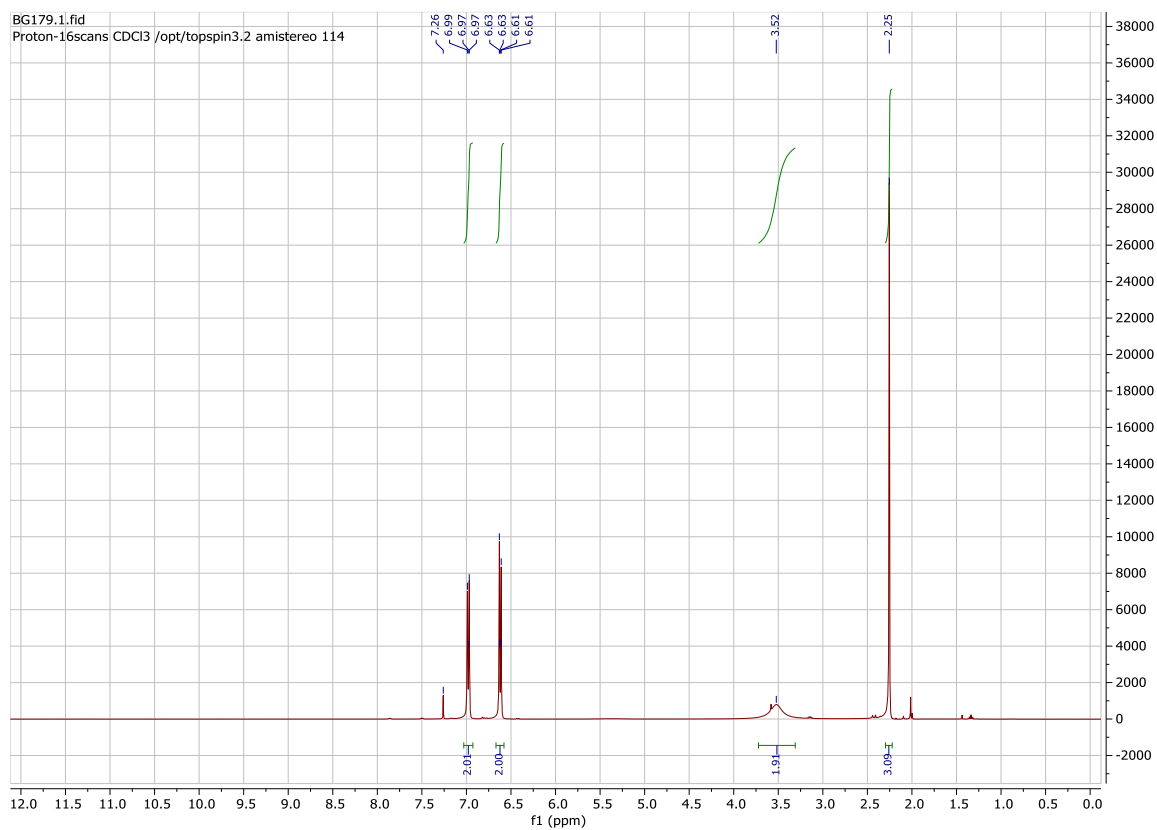

$^{13}\text{C}$  NMR of the purified amine:

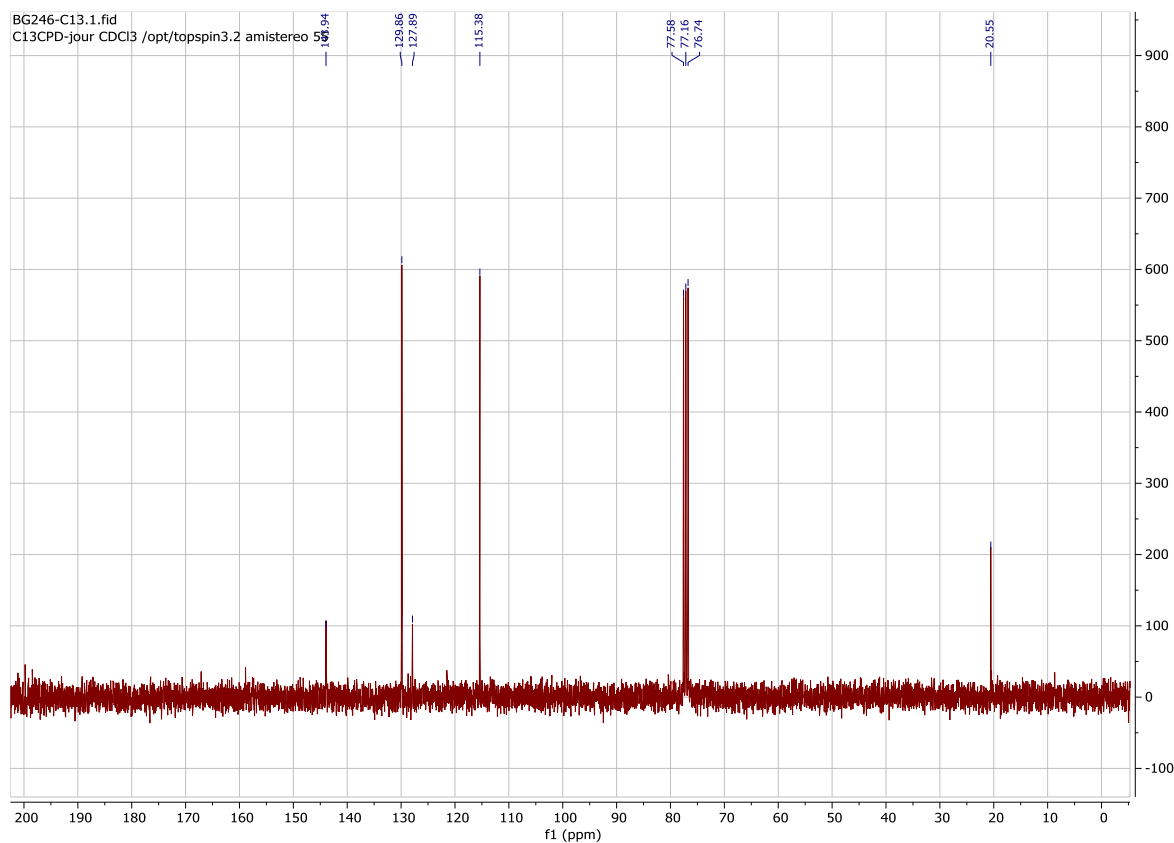

## 2-*t*-butylaniline **8**

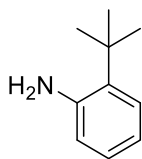

2-*t*-butylaniline (35.7 mg, 0.21 mmol, 1 equiv.) and naphthalene (27 mg, 0.21 mmol, 1 equiv.) were dissolved in pentane (1 mL). TCA (100 mg, 0.62 mmol, 3 equiv.) was added at room temperature. The precipitate formed was filtered and washed with ice cold pentane (2 x 2 mL). CH<sub>3</sub>CN (2 mL) and Et<sub>3</sub>N (0.04 mL, 0.32 mmol, 1.5 equiv.) were added and the solvent was evaporated at 60 °C (10-100 mbar) for 15 min to obtain the purified amine (29 mg, 0.18 mmol, 81% yield).

**<sup>1</sup>H NMR** (400 MHz, CDCl<sub>3</sub>): δ (ppm) 7.24 (d, *J* = 7.6 Hz, 1H), 7.04 (t, *J* = 7.6 Hz, 1H), 6.75 (t, *J* = 7.6 Hz, 1H), 6.65 (d, *J* = 8 Hz, 1H), 3.8 (br, 2H), 1.43 (s, 9H)

**<sup>13</sup>C NMR** (75 MHz, CDCl<sub>3</sub>): δ (ppm) 144.71, 133.83, 127.07, 126.64, 118.76, 117.89, 34.37, 29.71

Data in accordance with literature.

Reference : <https://www.sigmaaldrich.com/deepweb/assets/sigmaaldrich/quality/spectra/326/001/FNMR008031.pdf>

$^1\text{H}$  NMR of the purified amine:

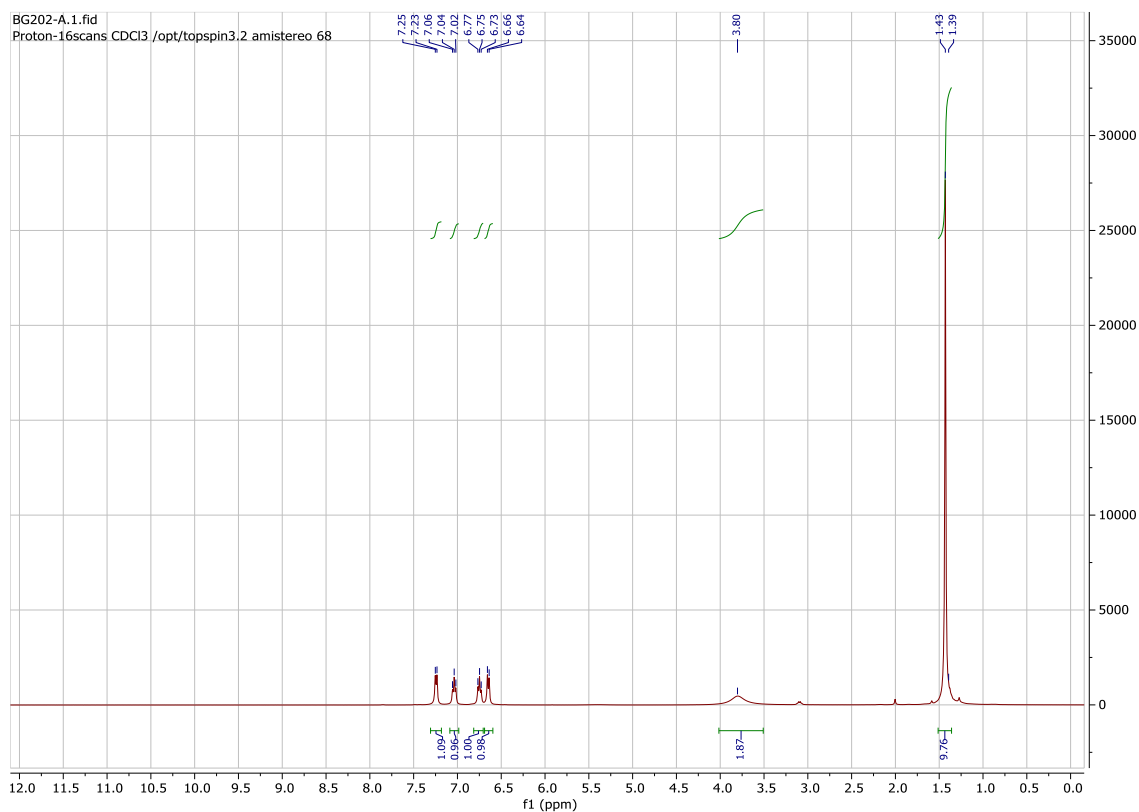

$^{13}\text{C}$  NMR of the purified amine:

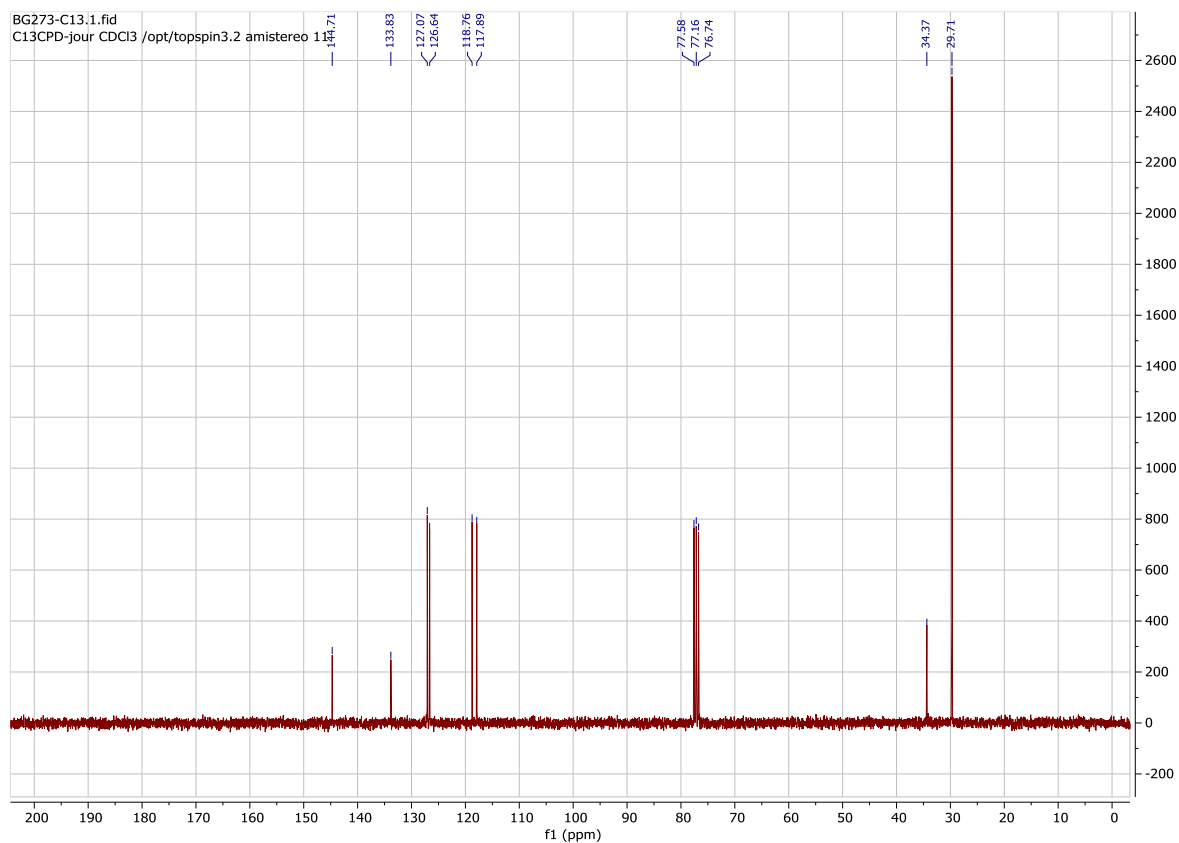

*p*-phenelyenediamine **9**

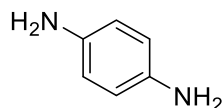

*p*-phenelyenediamine (23 mg, 0.21 mmol, 1 equiv.) and naphthalene (27 mg, 0.21 mmol, 1 equiv.) were dissolved in EtOAc (1 mL). TCA (100 mg, 0.62 mmol, 3 equiv.) was added at room temperature. The precipitate formed was filtered and washed with ice cold pentane (2 x 2 mL). CH<sub>3</sub>CN (2 mL) and Et<sub>3</sub>N (0.04 mL, 0.32 mmol, 1.5 equiv.) were added and the solvent was evaporated at 60 °C (10-100 mbar) for 15 min to obtain the purified amine (21 mg, 0.19 mmol, 91% yield).

**<sup>1</sup>H NMR** (400 MHz, CDCl<sub>3</sub>): δ (ppm) 6.57 (s, 4H) 3.27 (br, 4H)

**<sup>13</sup>C NMR** (75 MHz, CDCl<sub>3</sub>): δ (ppm) 138.73, 116.87

Data in accordance with literature.

Reference : <https://sdb.db.aist.go.jp/sdb/cgi-bin/landingpage?sdbno=1131>

$^1\text{H}$  NMR of the purified amine:

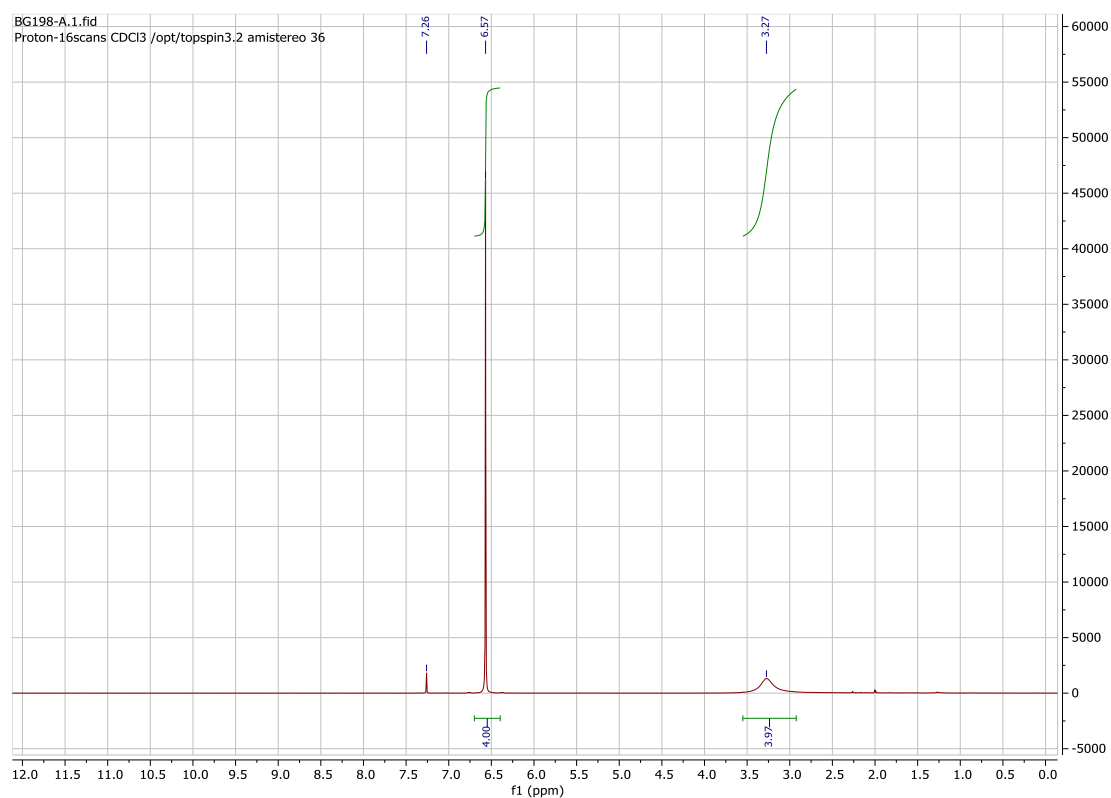

$^{13}\text{C}$  NMR of the purified amine:

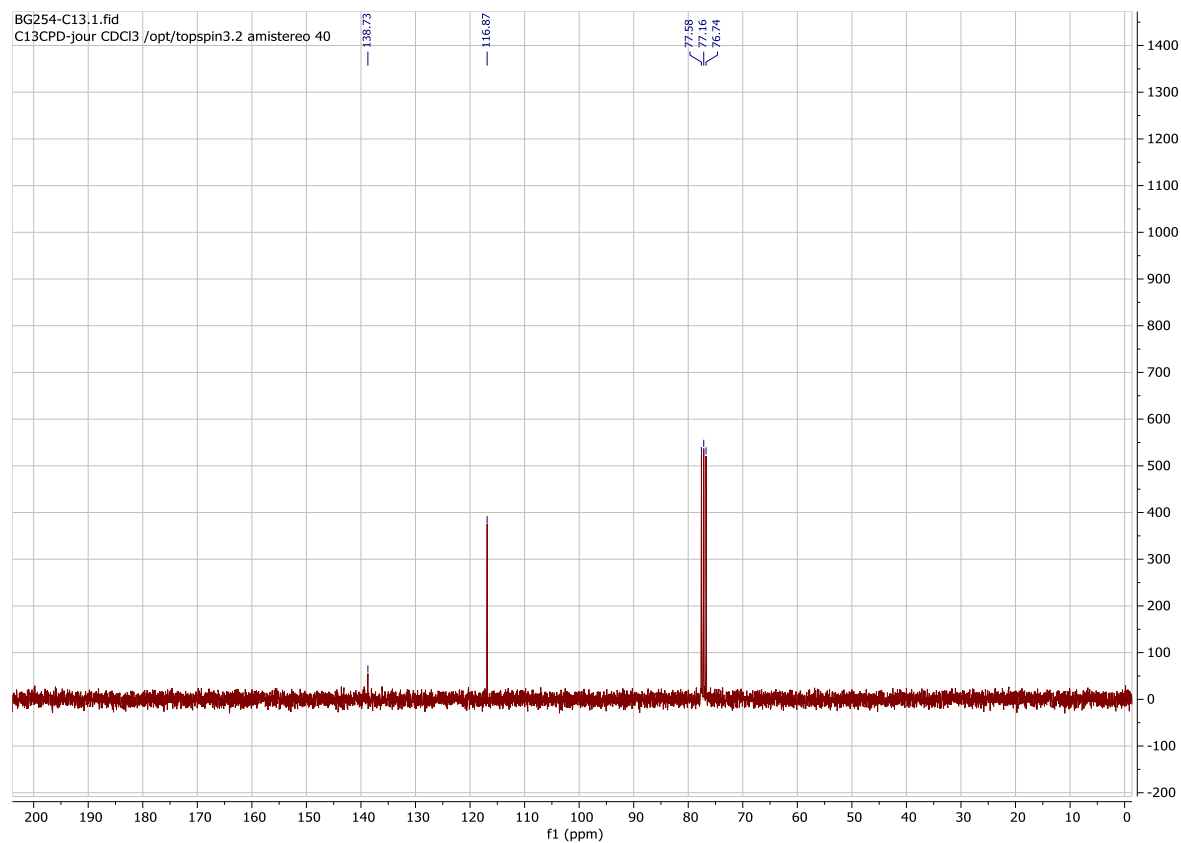

Methyl-3-amino-isonicotinate **10**

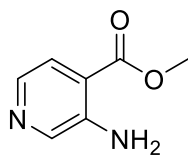

Methyl-3-amino-isonicotinate (32 mg, 0.21 mmol, 1 equiv.) and naphthalene (27 mg, 0.21 mmol, 1 equiv.) were dissolved in EtOAc (1 mL). TCA (100 mg, 0.62 mmol, 3 equiv.) was then added at room temperature. The precipitate formed was filtered and washed with pentane (2 x 2 mL). CH<sub>3</sub>CN (2 mL) and Et<sub>3</sub>N (0.04 mL, 0.32 mmol, 1.5 equiv.) were then added and the solvent was evaporated at 60 °C (30- 100 mbar) for 15 min to obtain purified amine (23 mg, 0.15 mmol, 72% yield).

**<sup>1</sup>H NMR** (400 MHz, CDCl<sub>3</sub>): δ (ppm) 8.18 (s, 1H), 7.9 (d, *J* = 4.92 Hz, 1H), 7.56 (d, *J* = 4.88 Hz, 1H), 5.68 (br, 2H), 3.89 (s, 1H)

**<sup>13</sup>C NMR** (75 MHz, CDCl<sub>3</sub>): δ (ppm) 167.56, 144.74, 140.84, 137.33, 122.93, 115.58, 52.16

Data in accordance with literature.

Reference : <https://www.tcichemicals.com/IN/en/p/M2653>

# <sup>1</sup>H NMR of the purified amine:

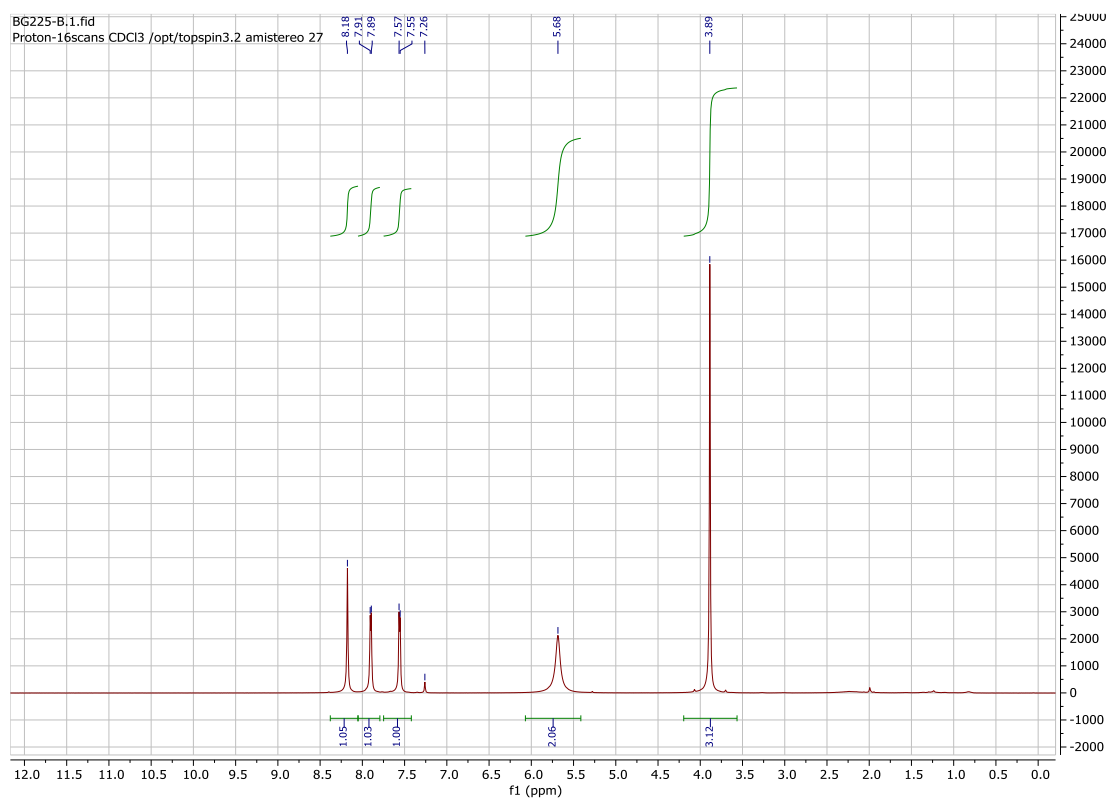

# <sup>13</sup>C NMR of the purified amine:

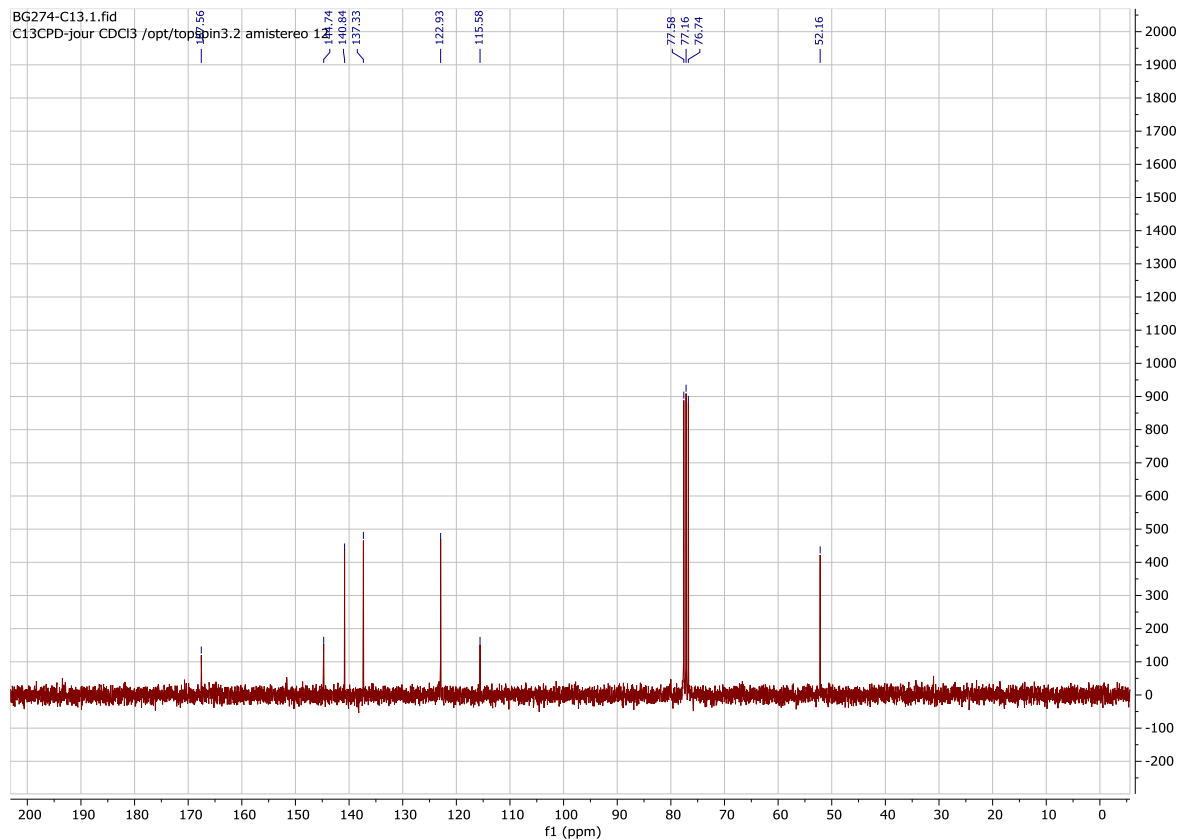



2,2,6,6-tetramethyl-4-piperidone **11**

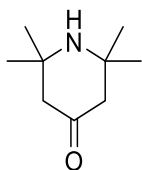

2,2,6,6-tetramethyl-4-piperidone (35.1 mg, 0.21 mmol, 1 equiv.) and naphthalene (27 mg, 0.21 mmol, 1 equiv.) were dissolved in EtOAc (1 mL). TCA (100 mg, 0.62 mmol, 3 equiv.) was then added at room temperature. The precipitate formed was filtered and washed with EtOAc (2 x 2 mL). CH<sub>3</sub>CN (2 mL) and Et<sub>3</sub>N (0.04 mL, 0.32 mmol, 1.5 equiv.) were then added and the solvent was evaporated at 60 °C (30- 100 mbar) for 15 min to obtain purified amine (33 mg, 0.19 mmol, 94% yield).

**<sup>1</sup>H NMR** (400 MHz, CDCl<sub>3</sub>): δ (ppm) 2.67 (s, 4H), 1.51 (s, 12H)

**<sup>13</sup>C NMR** (75 MHz, CDCl<sub>3</sub>): δ (ppm) 210.98, 55.40, 54.16, 32.06

Data in accordance with literature.

Reference : <https://sdb.db.aist.go.jp/sdb/cgi-bin/landingpage?sdbno=21557>

### $^1\text{H}$ NMR of the purified amine:

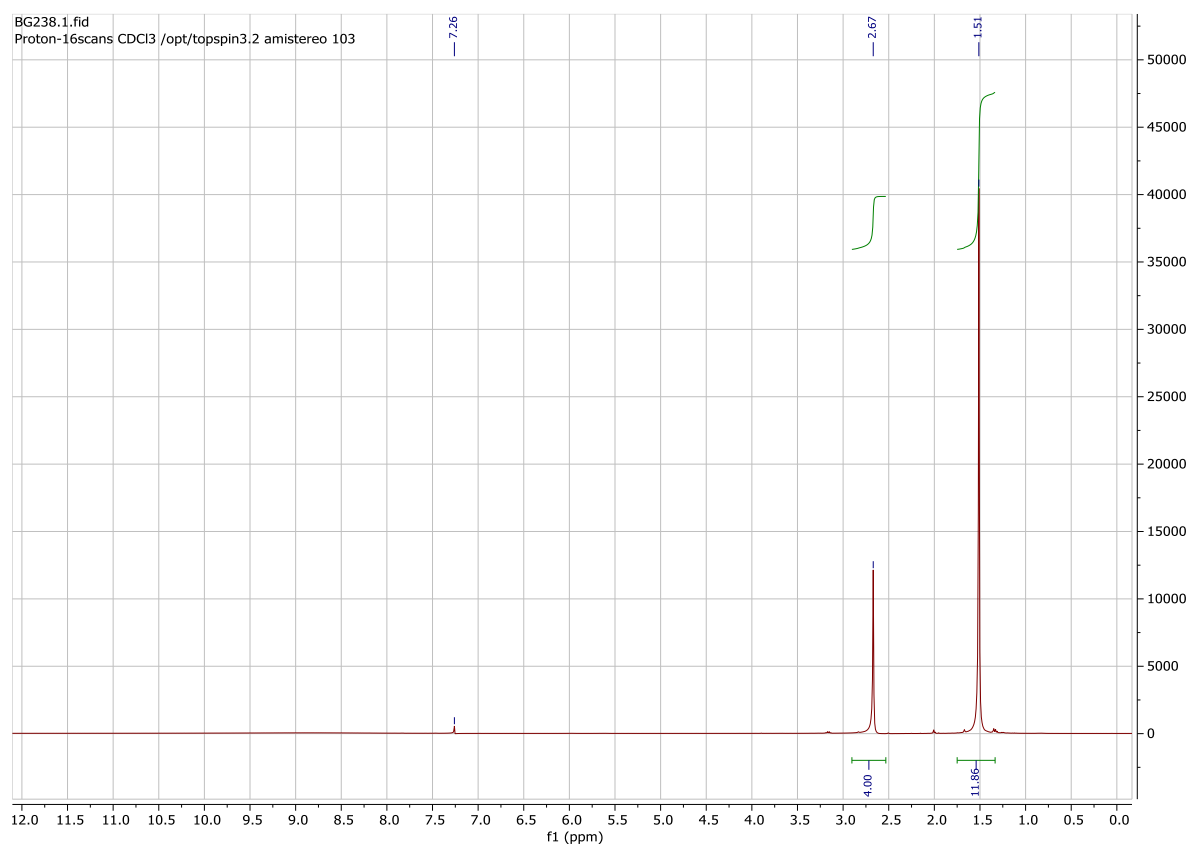

### $^{13}\text{C}$ NMR of the purified amine:

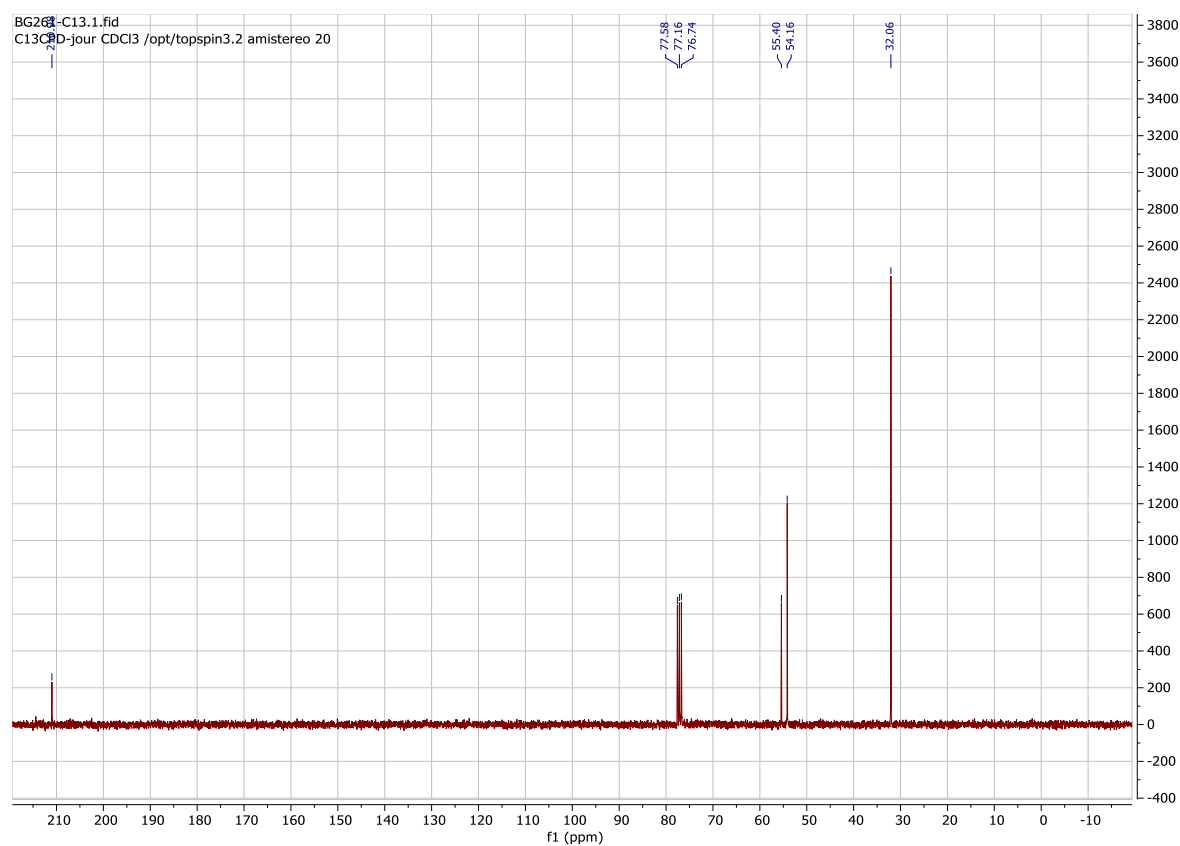

## Acridine **12**

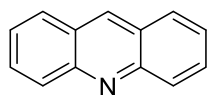

Acridine (40.2 mg, 0.21 mmol, 1 equiv.) and 2-methoxynaphthalene (33 mg, 0.21 mmol, 1 equiv.) were dissolved in Pentane-Et<sub>2</sub>O (1 mL). TCA (100 mg, 0.62 mmol, 3 equiv.) was then added at room temperature. The precipitate formed was filtered and washed with pentane (2 x 2 mL). CH<sub>3</sub>CN (2 mL) and Et<sub>3</sub>N (0.04 mL, 0.32 mmol, 1.5 equiv.) were added and the solvent was evaporated at 60 °C (10-100 mbar) for 25 min to obtain the purified amine (26 mg, 0.2 mmol, 65% yield).

**<sup>1</sup>H NMR** (400 MHz, CDCl<sub>3</sub>): δ (ppm) 8.72 (s, 1H), 8.24 (d, *J* = 12 Hz, 2H), 7.97 (d, *J* = 8 Hz, 2H), 7.76 (t, *J* = 8 Hz, 2H), 7.51 (t, *J* = 8 Hz, 2H)

**<sup>13</sup>C NMR** (75 MHz, CDCl<sub>3</sub>): δ (ppm) 149.13, 136.07, 130.34, 129.46, 128.26, 126.63, 125.71

Data in accordance with literature.

Reference : <https://sdb.db.aist.go.jp/sdb/cgi-bin/landingpage?sdbno=1360>

$^1\text{H}$  NMR of the purified amine:

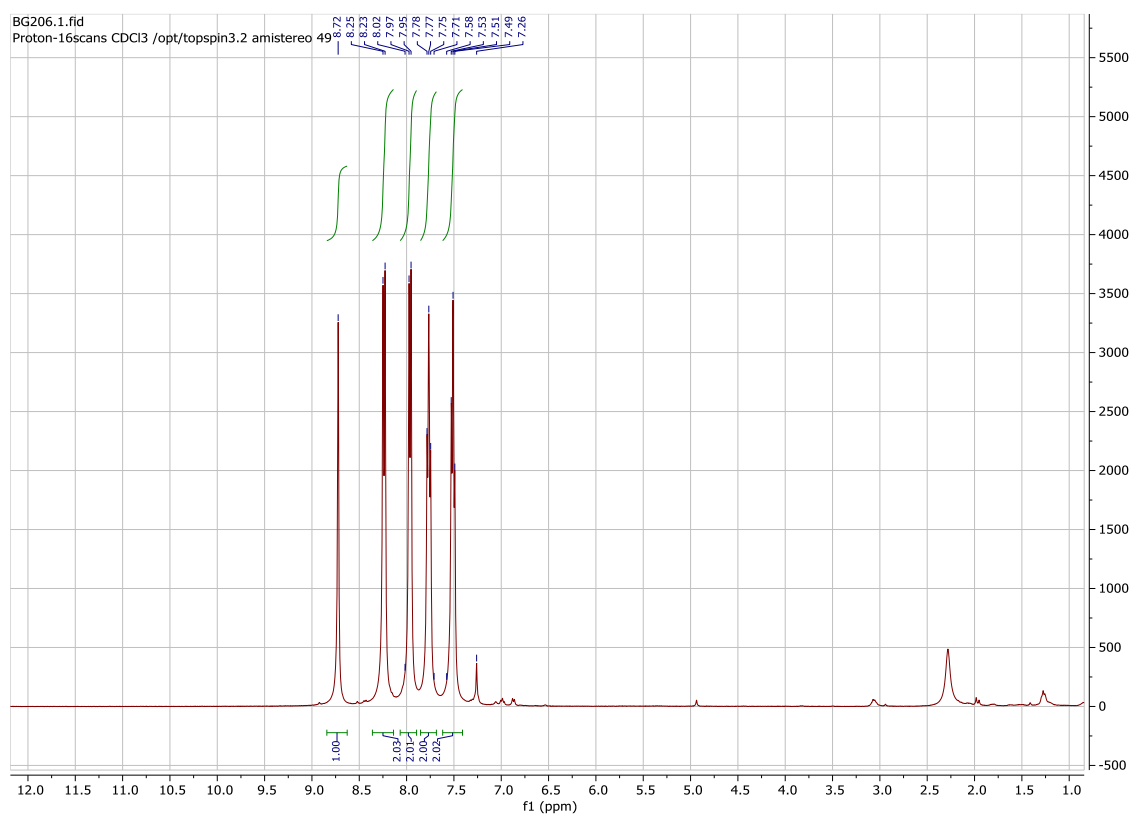

$^{13}\text{C}$  NMR of the purified amine:

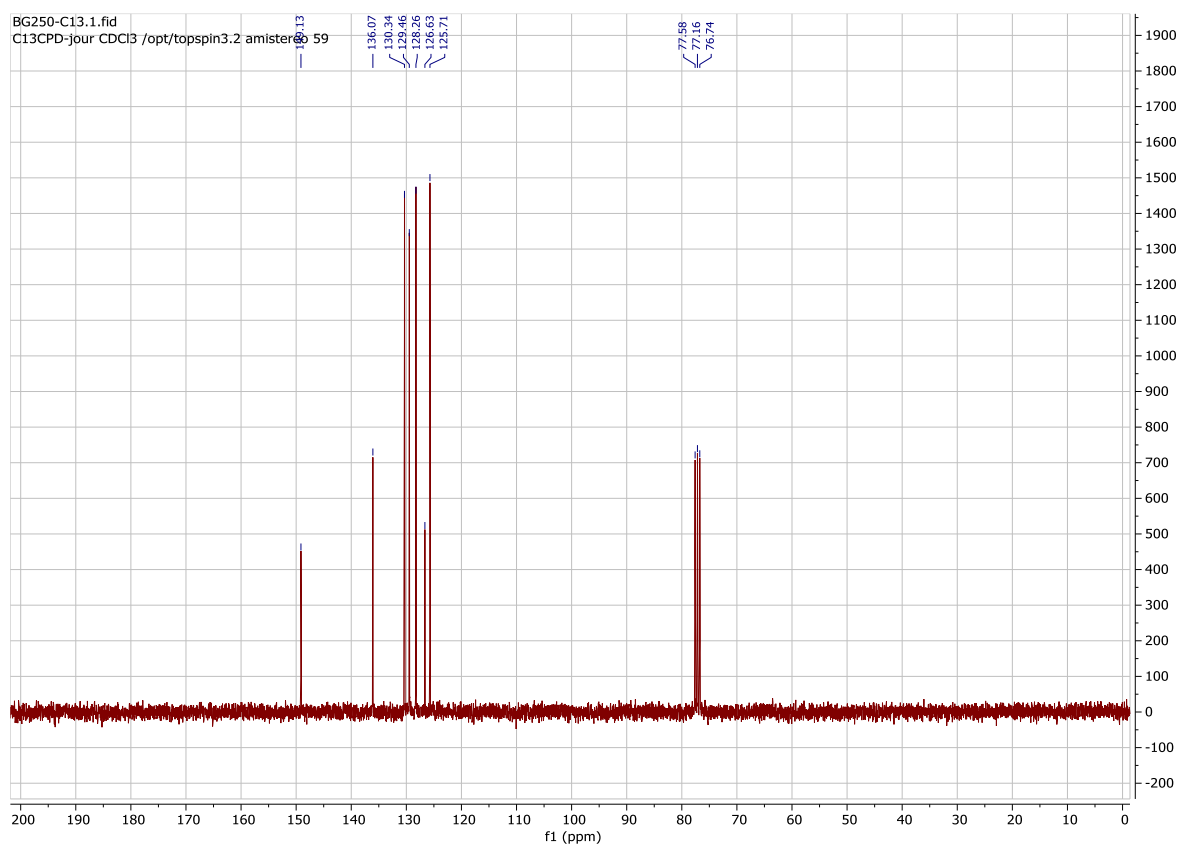

### 1,2-dimethylimidazole **13**

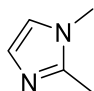

1,2-dimethylimidazole (20 mg, 0.21 mmol, 1 equiv.) and naphthalene (27 mg, 0.21 mmol, 1 equiv.) were dissolved in pentane (1 mL). TCA (100 mg, 0.62 mmol, 3 equiv.) was added at room temperature. The precipitate formed was filtered and washed with ice cold pentane (2 x 2 mL). CH<sub>3</sub>CN (2 mL) and Et<sub>3</sub>N (0.04 mL, 0.32 mmol, 1.5 equiv.) were added and the solvent was evaporated at 60 °C (10-100 mbar) for 15 min to obtain the purified amine (11 mg, 0.11 mmol, 53% yield).

**<sup>1</sup>H NMR** (400 MHz, CDCl<sub>3</sub>): δ (ppm) 6.87 (s, 1H), 6.76 (s, 1H), 3.54 (s, 3H), 2.35 (s, 3H)

**<sup>13</sup>C NMR** (75 MHz, CDCl<sub>3</sub>): δ (ppm) 144.99, 126.87, 120.39, 32.78, 12.83

Data in accordance with literature.

Reference : <https://sdb.db.aist.go.jp/sdb/cgi-bin/landingpage?sdbno=4181>

$^1\text{H}$  NMR of the purified amine:

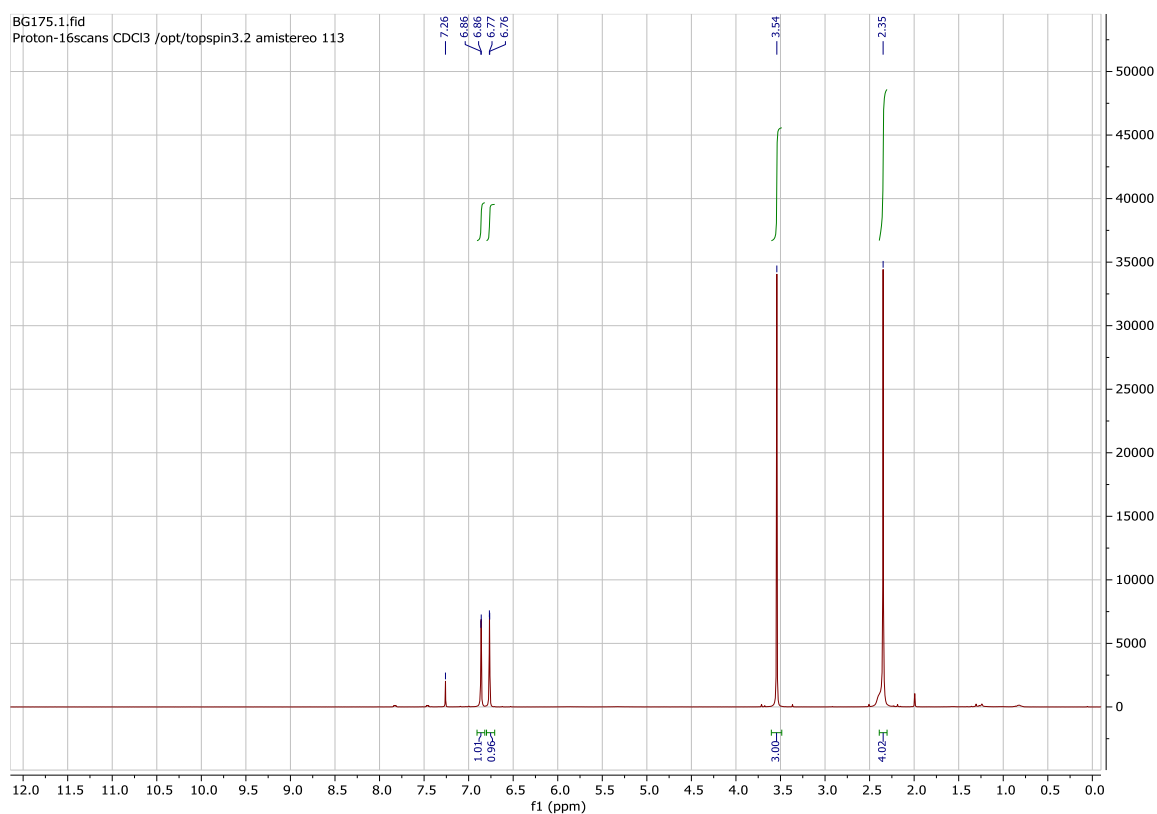

$^{13}\text{C}$  NMR of the purified amine:

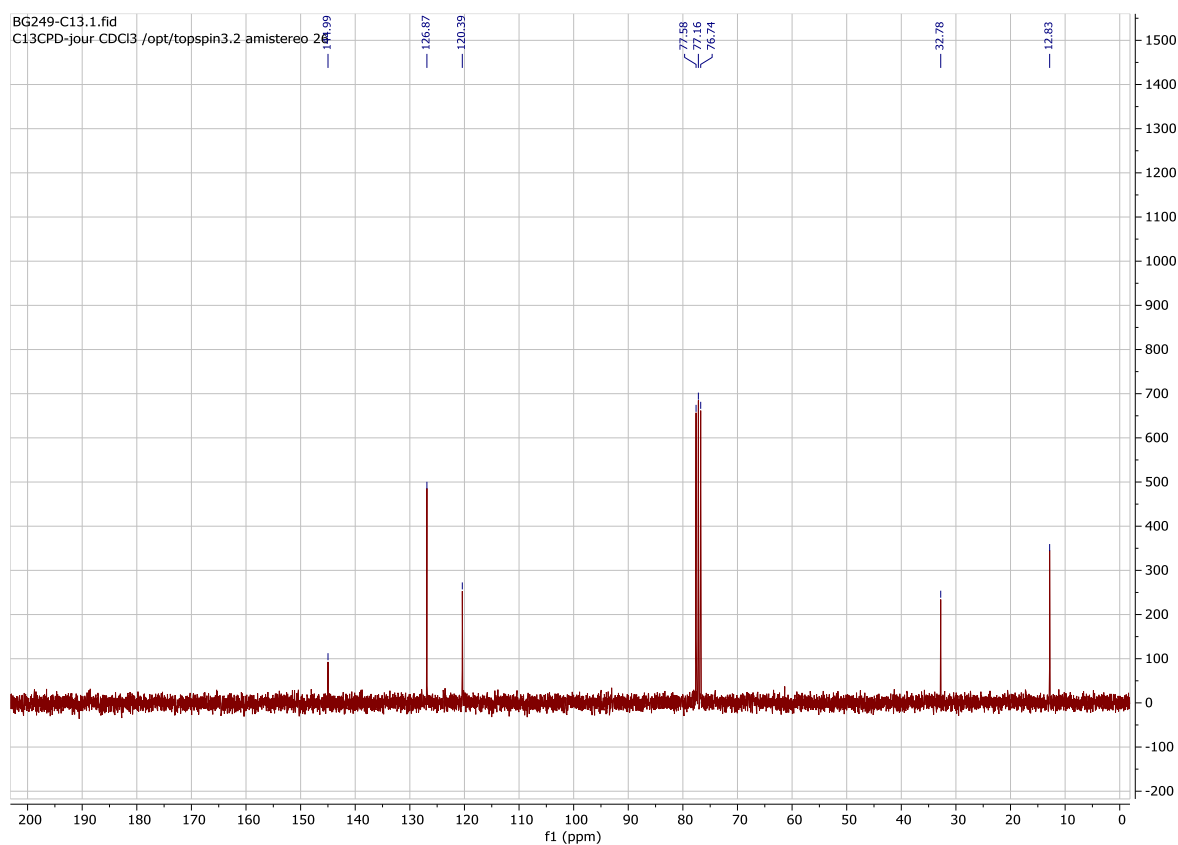

## Brucin **14**

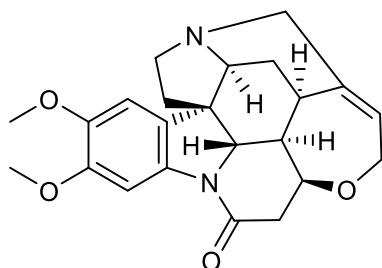

Brucin (83 mg, 0.21 mmol, 1 equiv.) and naphthalene (27 mg, 0.21 mmol, 1 equiv.) were dissolved in CH<sub>3</sub>CN (1 mL). TCA (100 mg, 0.62 mmol, 3 equiv.) was added at room temperature. The precipitate formed was filtered and washed with ice cold pentane (2 x 2 mL). CH<sub>3</sub>CN (2 mL) and Et<sub>3</sub>N (0.04 mL, 0.32 mmol, 1.5 equiv.) were added and the solvent was evaporated at 60 °C (10-100 mbar) for 15 min to obtain the purified amine (49 mg, 0.12 mmol, 57% yield).

**<sup>1</sup>H NMR** (400 MHz, CDCl<sub>3</sub>): δ (ppm) 7.77 (s, 1H), 6.63 (s, 1H), 5.85 (s, 1H), 4.26-4.22 (m, 1H), 4.12-3.99 (m, 2H), 3.86 (s, 3H), 3.81 (s, 3H), 3.77 (s, 1H), 3.64 (d, *J* = 12 Hz, 1H), 3.14-3.02 (m, 3H), 2.83-2.76 (m, 1H), 2.68-2.58 (m, 2H), 2.41 (s, 1H), 2.33-2.27 (m, 1H), 1.88-1.77 (m, 2H), 1.42 (d, *J* = 12 Hz, 1H), 1.23-1.19 (m, 1H)

**<sup>13</sup>C NMR** (75 MHz, CDCl<sub>3</sub>): δ (ppm) 169.07, 149.41, 146.39, 140.59, 136.14, 127.51, 123.58, 105.78, 101.19, 77.93, 64.73, 60.51, 60.09, 56.62, 56.34, 52.83, 52.08, 50.30, 48.42, 42.57, 42.52, 31.71, 26.95

Data in accordance with literature.

Reference : <https://sdb.sdb.aist.go.jp/sdb/cgi-bin/landingpage?sdbno=4394>

$^1\text{H}$  NMR of the purified amine:

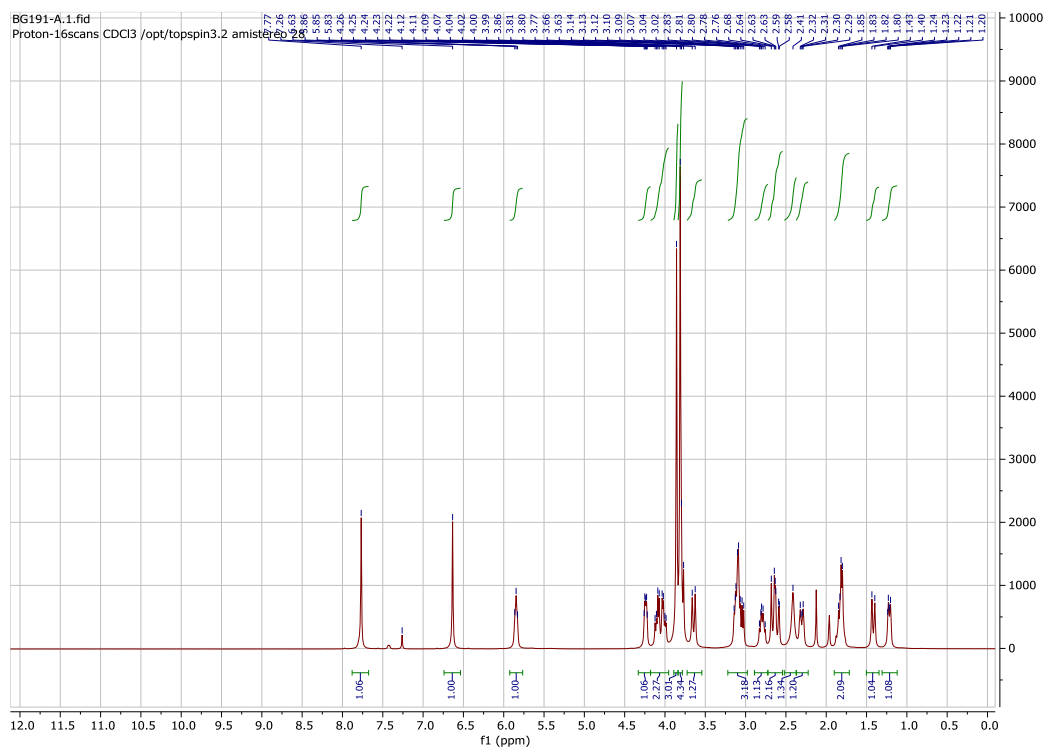

$^{13}\text{C}$  NMR of the purified amine:

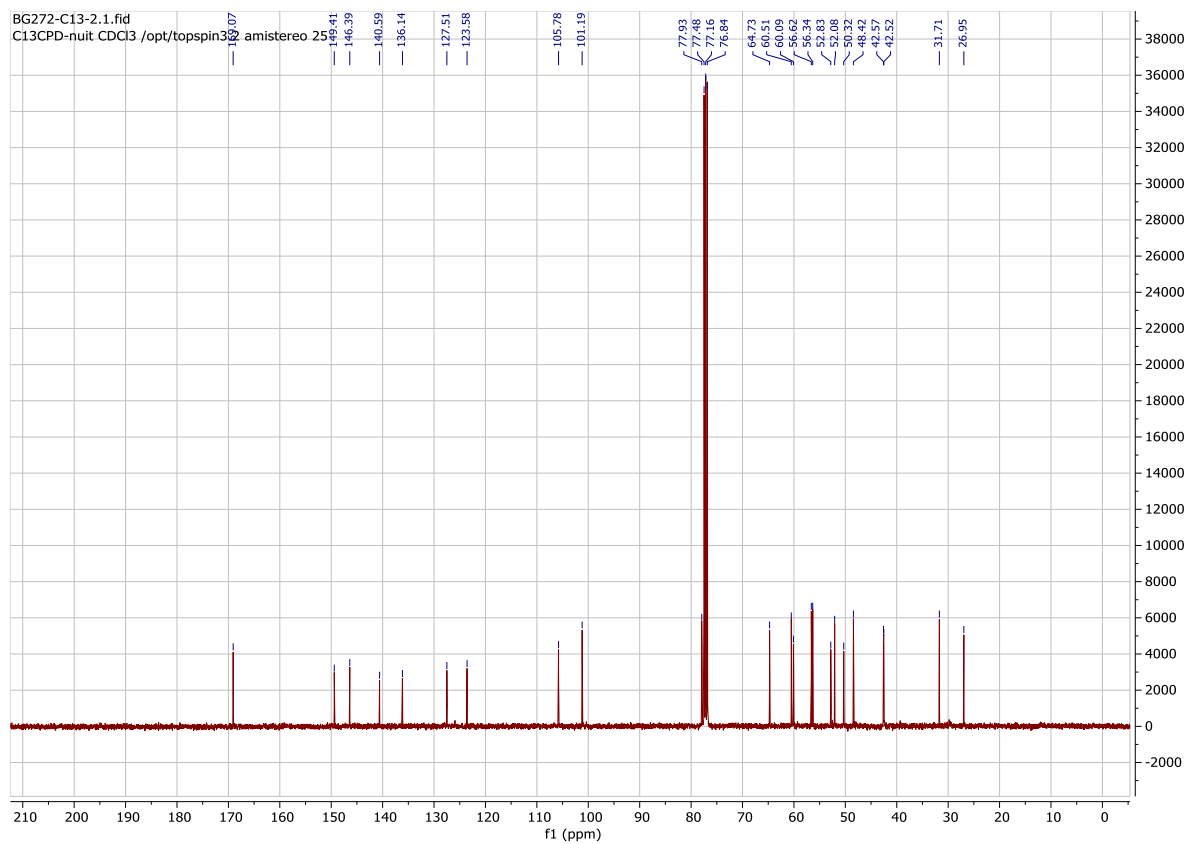



## Synthesis of *p*-toluidine **7**

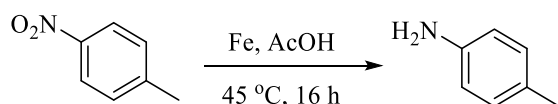

To a dry flask was added 1-methyl-4-nitrobenzene (137.14 mg, 1 mmol, 1 equiv.) and Fe (184 mg, 3.3 mmol, 3.3 equiv.). Then AcOH (5 mL) was added, and the reaction mixture was stirred at 45 °C for 16 h. After confirming the completion of the reaction by TLC, the crude reaction mixture was filtered to remove solid impurities, and the filtrate was concentrated to remove most AcOH. TCA (500 mg, 3 mmol, 3 equiv.) was then added at room temperature. The precipitate formed was filtered and washed with pentane (2 x 3 mL). CH<sub>3</sub>CN (2 mL) and Et<sub>3</sub>N (0.2 mL, 1.5 mmol, 1.5 equiv.) were added and the solvent was evaporated at 60 °C (30-100 mbar) for 15 min to obtain the purified amine (71 mg, 0.66 mmol, 66% yield).

**<sup>1</sup>H NMR** (400 MHz, CDCl<sub>3</sub>): δ (ppm) 6.98 (d, *J* = 7.6 Hz, 2H), 6.61 (d, *J* = 7.9 Hz, 2H), 3.36 (br, 2H), 2.26 (s, 3H)

**<sup>13</sup>C NMR** (75 MHz, CDCl<sub>3</sub>): δ (ppm) 143.81, 129.76, 127.83, 115.32, 20.45

Data in accordance with literature.

Reference : <https://sdb.db.aist.go.jp/sdb/cgi-bin/landingpage?sdbno=990>

# <sup>1</sup>H NMR of the purified amine:

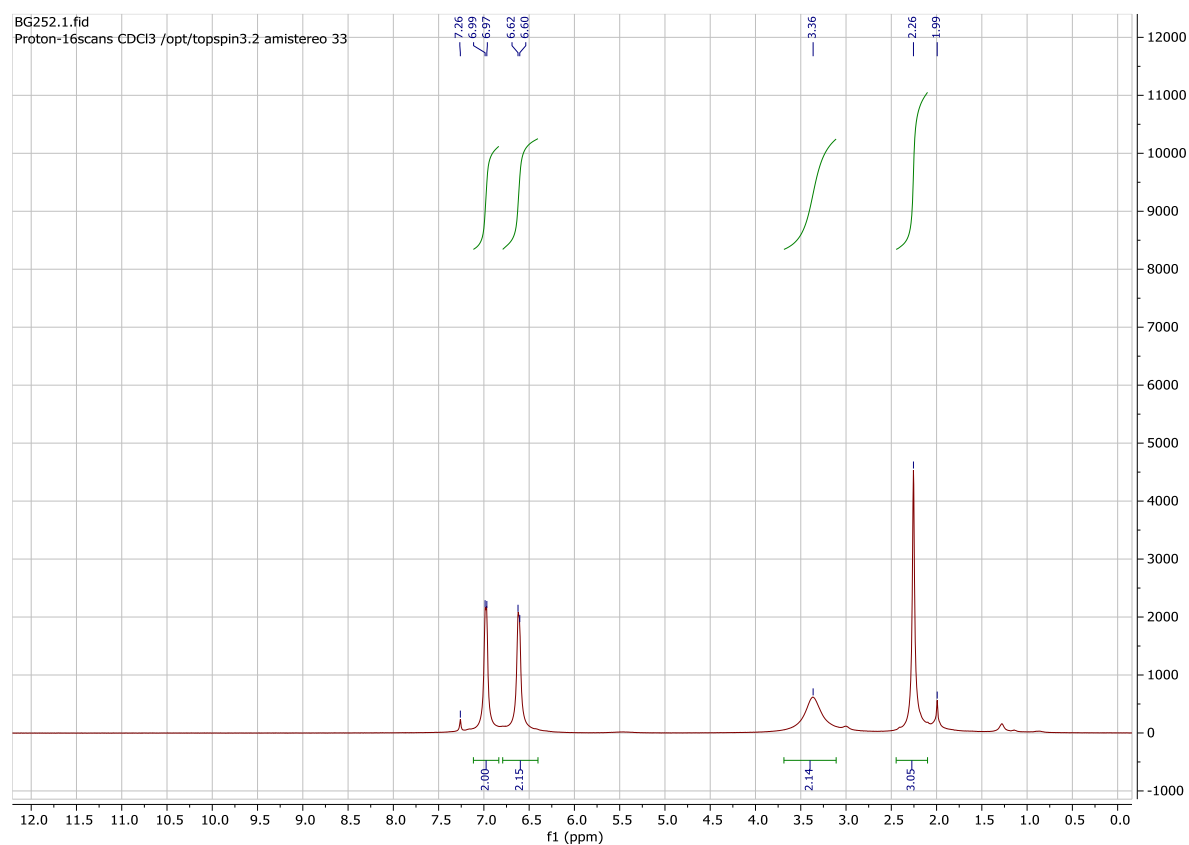

# <sup>13</sup>C NMR of the purified amine:

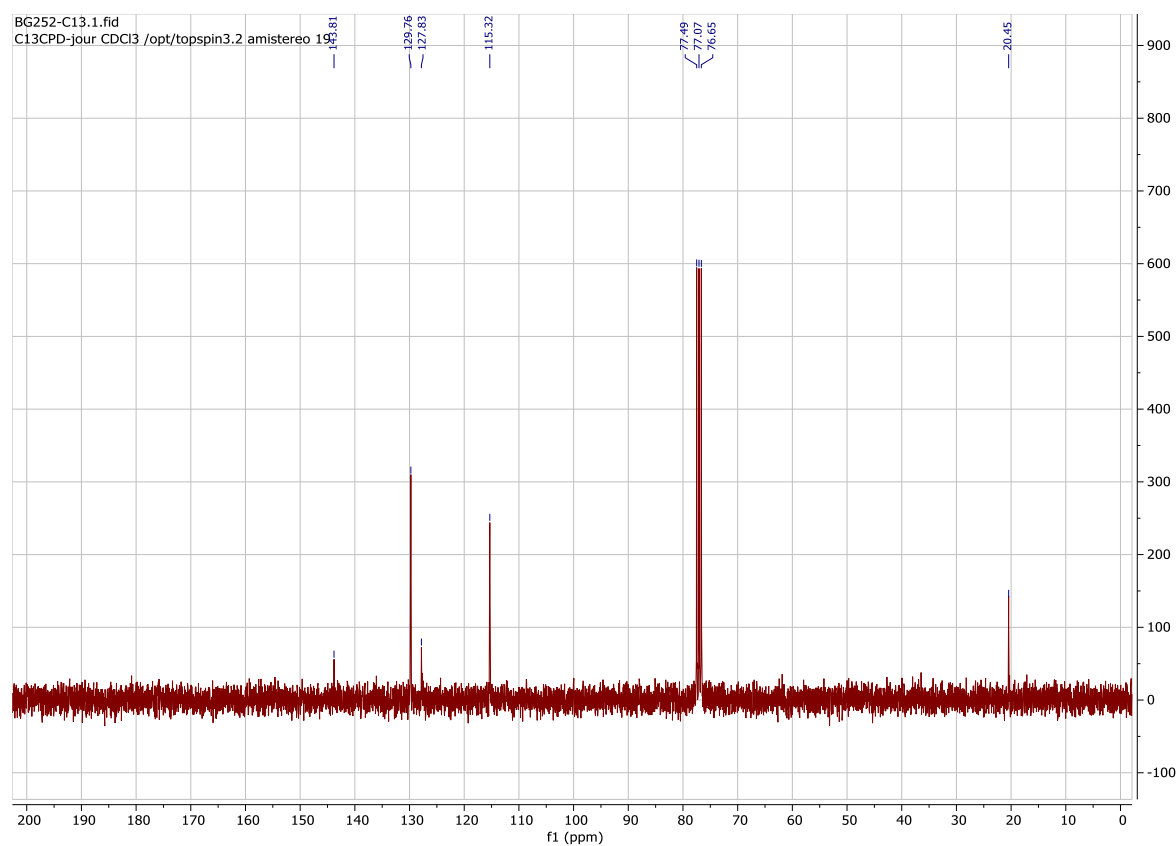

Examples of amines who did not generate a TCA salt precipitate in our first attempts:

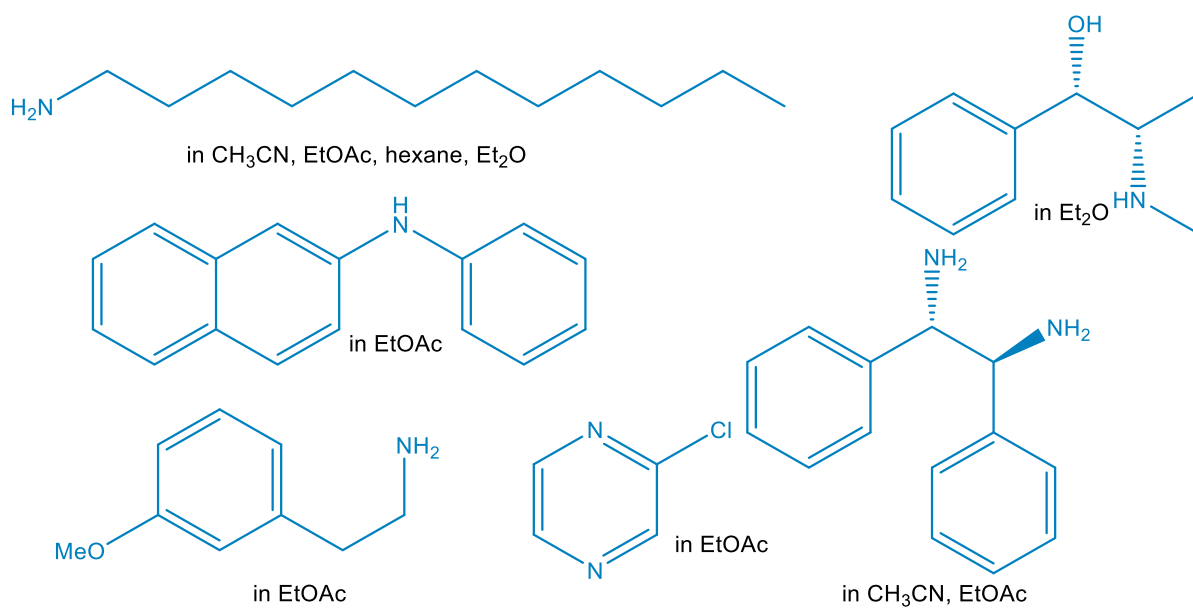

Supplement: Additional file 1 [file 1860-5397-18-26-S1.pdf]
